# Supplementary material
Source: PubMed Central journal article supplement (PMC3371367)
Supplement: NIHMS285400-supplement-1_si_001.pdf [file NIHMS285400-supplement-1_si_001.pdf]

## Supporting Information for

### **Pierreiones A – D, Solid Tumor Selective Pyranoisoflavones and Other Cytotoxic Constituents**

#### ***from *Antheroporum pierrei****

Song Gao,<sup>†</sup> Ya-ming Xu,<sup>†</sup> Frederick A. Valeriote,<sup>\*,‡</sup> and A. A. Leslie Gunatilaka<sup>\*,†</sup>

<sup>†</sup> *Southwest Center for Natural Products Research and Commercialization, School of Natural Resources and the Environment, College of Agriculture and Life Sciences, The University of Arizona, 250 E. Valencia Road, Tucson, Arizona 85706-6800,*

<sup>‡</sup> *Division of Hematology & Oncology, Department of Internal Medicine, Henry Ford Hospital, Detroit, Michigan 48202*

## Table of Contents

|                                                                                                                                                              |     |
|--------------------------------------------------------------------------------------------------------------------------------------------------------------|-----|
| <b>Figure S1.</b> $^1\text{H}$ NMR Spectrum (500 MHz) of Pierreione A ( <b>1</b> ) in $\text{CDCl}_3$ .....                                                  | S2  |
| <b>Figure S2.</b> $^{13}\text{C}$ NMR Spectrum (125 MHz) of Pierreione A ( <b>1</b> ) in $\text{CDCl}_3$ .....                                               | S3  |
| <b>Figure S3.</b> COSY Spectra (500 MHz) of Pierreione A ( <b>1</b> ) in $\text{CDCl}_3$ .....                                                               | S4  |
| <b>Figure S4.</b> HSQC Spectra (500 MHz) of Pierreione A ( <b>1</b> ) in $\text{CDCl}_3$ .....                                                               | S5  |
| <b>Figure S5.</b> HMBC Spectra (500 MHz) of Pierreione A ( <b>1</b> ) in $\text{CDCl}_3$ .....                                                               | S6  |
| <b>Figure S6.</b> $^1\text{H}$ NMR Spectrum (500 MHz) of Pierreione B ( <b>2</b> ) in $\text{CDCl}_3$ .....                                                  | S7  |
| <b>Figure S7.</b> $^{13}\text{C}$ NMR Spectrum (125 MHz) of Pierreione B ( <b>2</b> ) in $\text{CDCl}_3$ .....                                               | S8  |
| <b>Figure S8.</b> $^1\text{H}$ NMR Spectrum (500 MHz) of Pierreione C ( <b>3</b> ) in $\text{CDCl}_3$ .....                                                  | S9  |
| <b>Figure S9.</b> $^{13}\text{C}$ NMR Spectrum (125 MHz) of Pierreione C ( <b>3</b> ) in $\text{CDCl}_3$ .....                                               | S10 |
| <b>Figure S10.</b> $^1\text{H}$ NMR Spectrum (500 MHz) of Pierreione D ( <b>4</b> ) in $\text{CDCl}_3$ .....                                                 | S11 |
| <b>Figure S11.</b> $^1\text{H}$ NMR Spectrum (600 MHz) of Rotenone ( <b>5</b> ) in $\text{CDCl}_3$ .....                                                     | S12 |
| <b>Figure S12.</b> $^1\text{H}$ NMR Spectrum (500 MHz) of 12a-Hydroxyrotenone ( <b>6</b> ) in $\text{CDCl}_3$ .....                                          | S13 |
| <b>Figure S13.</b> $^{13}\text{C}$ NMR Spectrum (125 MHz) of 12a-Hydroxyrotenone ( <b>6</b> ) in $\text{CDCl}_3$ .....                                       | S14 |
| <b>Figure S14.</b> $^1\text{H}$ NMR Spectrum (500 MHz) of Tephrosin ( <b>7</b> ) in $\text{CDCl}_3$ .....                                                    | S15 |
| <b>Figure S15.</b> $^1\text{H}$ NMR Spectrum (600 MHz) of ( <i>S</i> )-MTPA Ester of Pierreione A ( <b>8a</b> ) in $\text{Py-d}_5$ .....                     | S16 |
| <b>Figure S16.</b> $^1\text{H}$ NMR Spectrum (600 MHz) of ( <i>R</i> )-MTPA Ester of Pierreione A ( <b>8b</b> ) in $\text{Py-d}_5$ .....                     | S17 |
| <b>Figure S17.</b> Key HMBC ( $\text{H}\rightarrow\text{C}$ ) and NOE ( $\text{H}\leftrightarrow\text{H}$ ) Correlations for <b>1</b> .....                  | S18 |
| <b>Figure S18.</b> $\Delta\delta$ Values Obtained for ( <i>S</i> )- and ( <i>R</i> )-MTPA Esters ( <b>8a</b> and <b>8b</b> , respectively) of <b>1</b> ..... | S19 |

**Figure S1.**  $^1\text{H}$  NMR Spectrum (500 MHz) of Pierreione A (**1**) in  $\text{CDCl}_3$

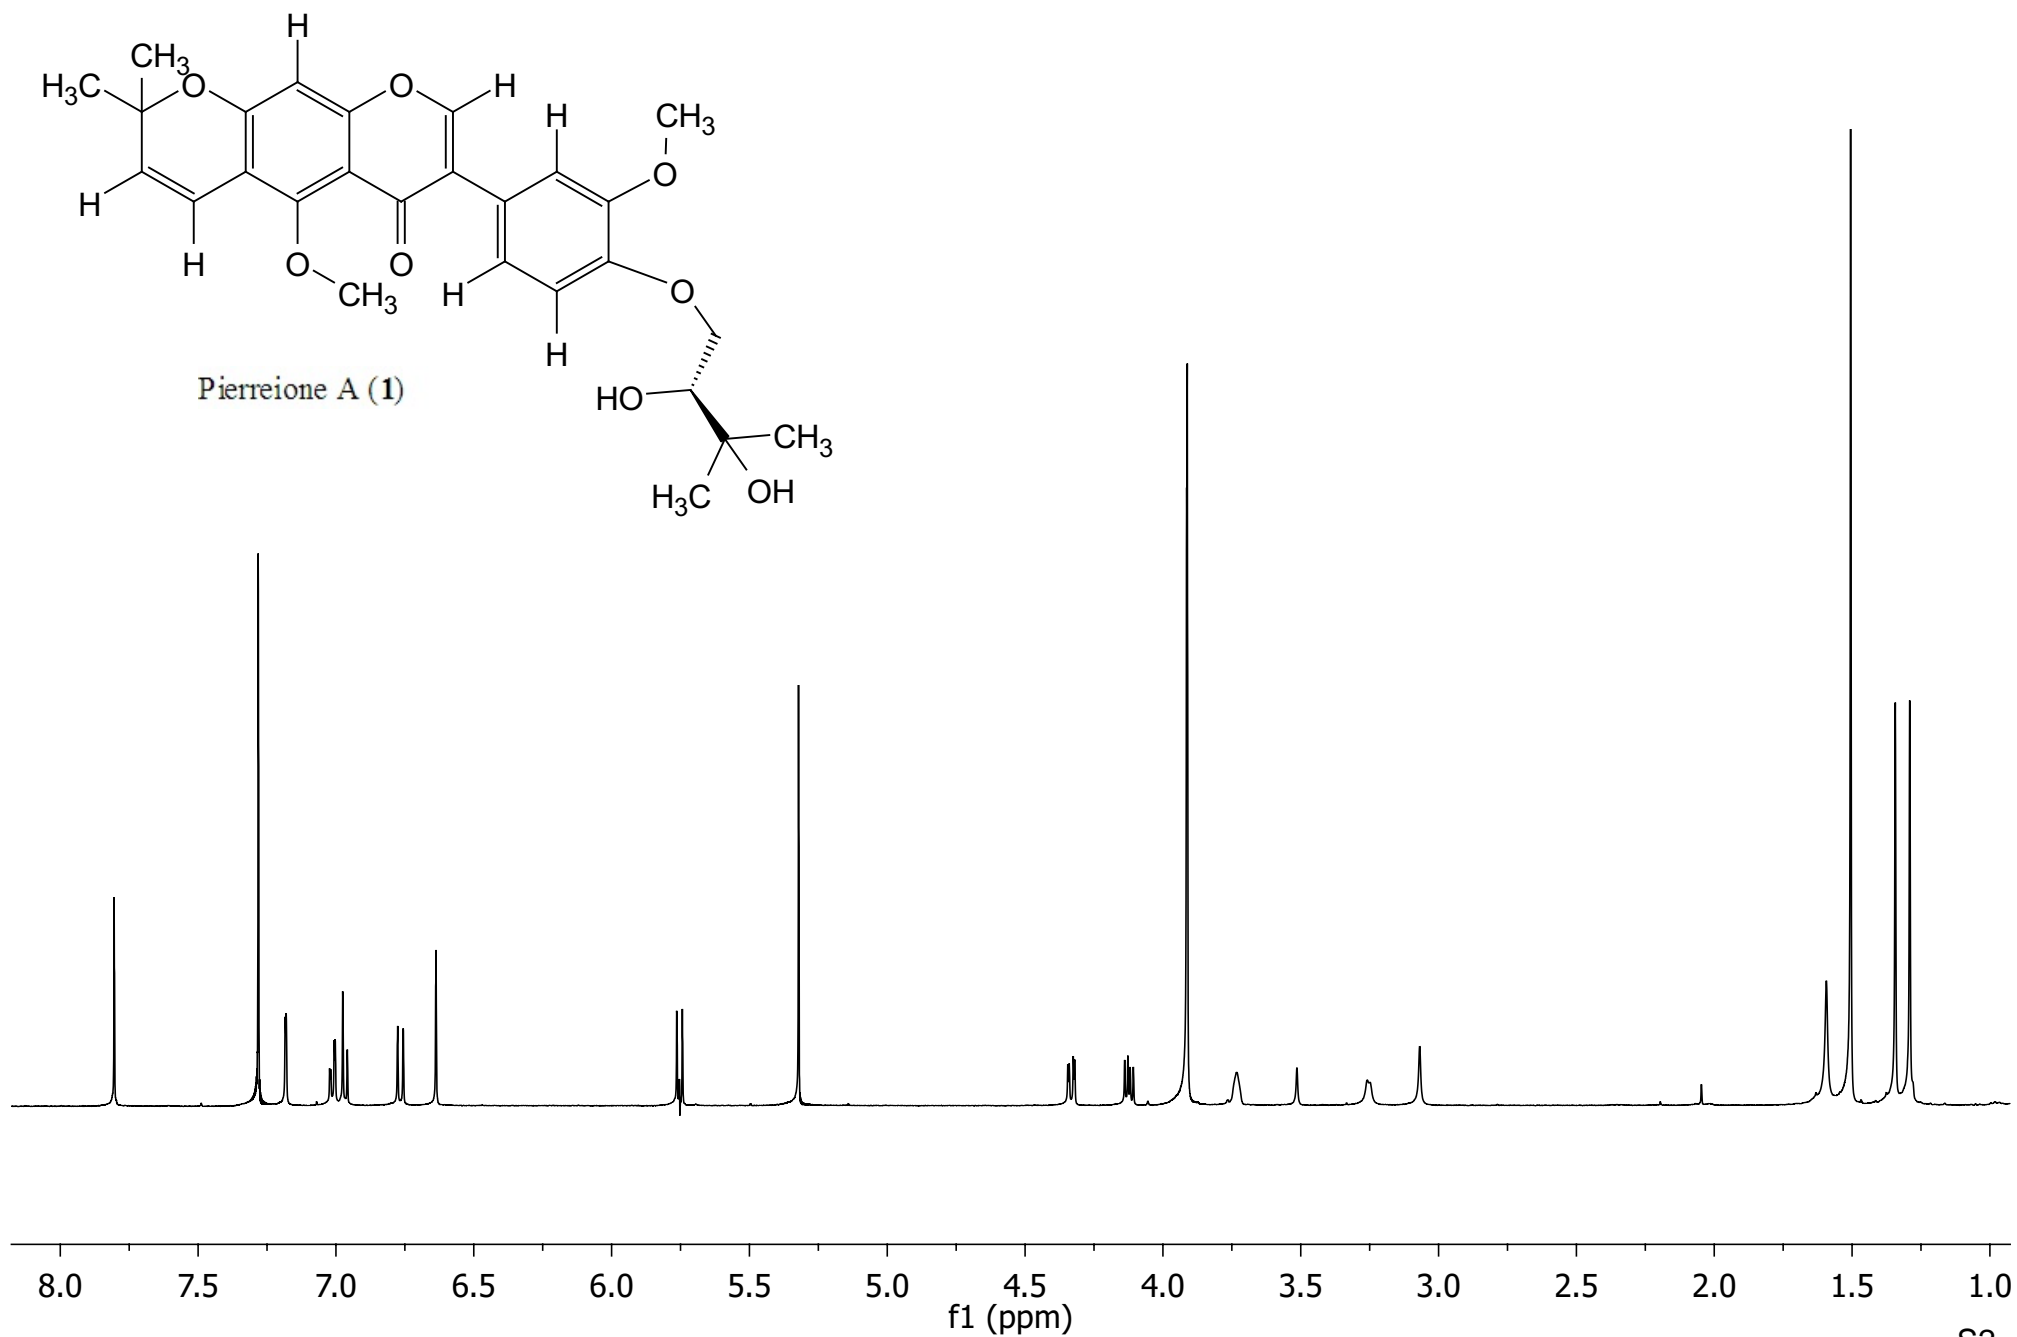

Figure S2.  $^{13}\text{C}$  NMR Spectrum (125 MHz) of Pierreione A (1) in  $\text{CDCl}_3$

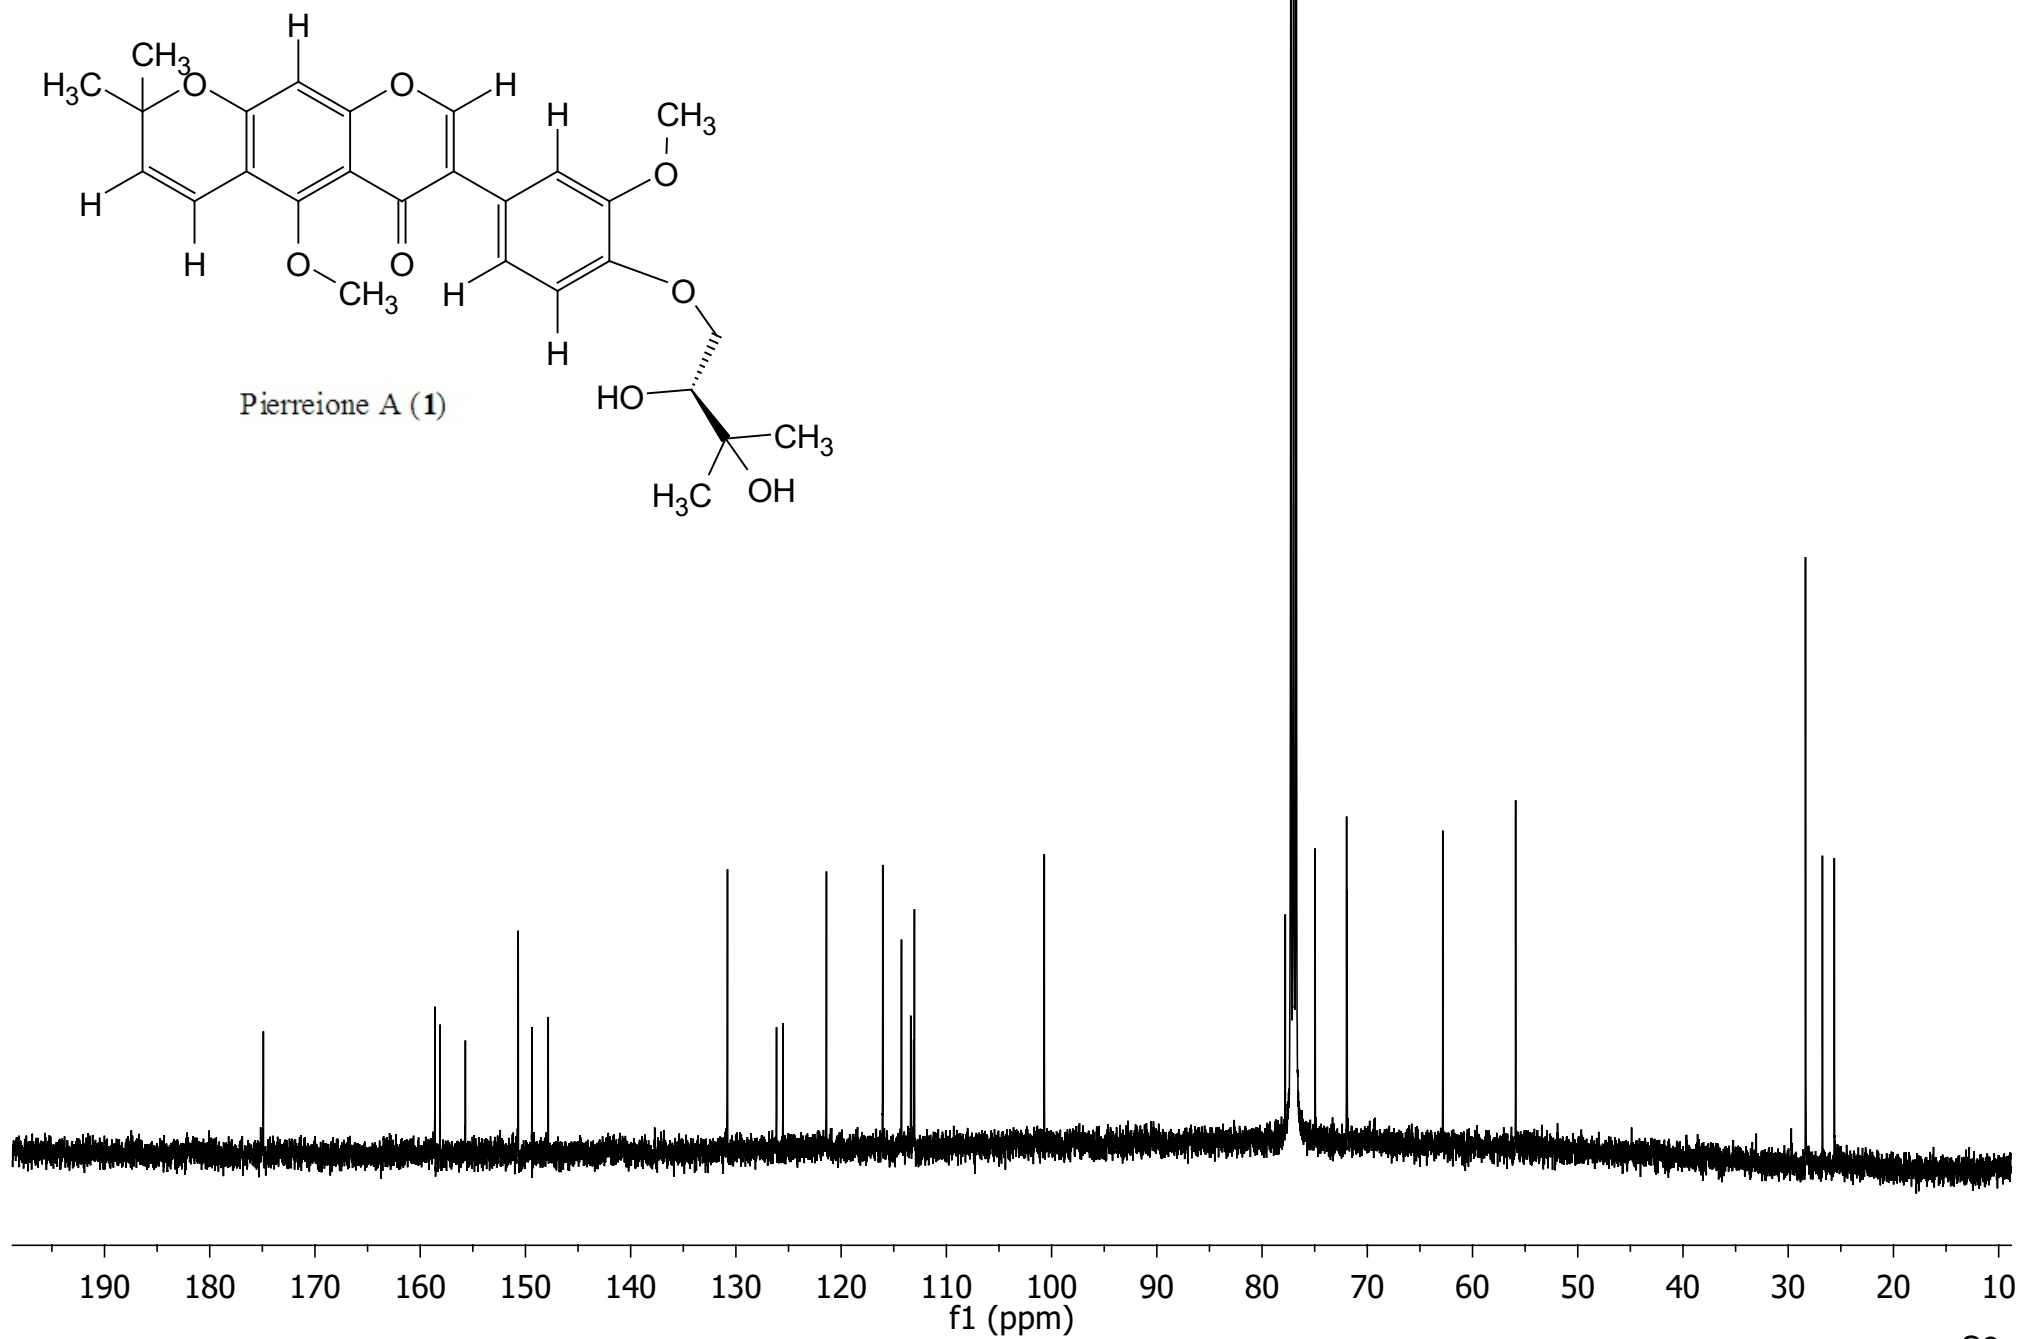

Figure S3. COSY Spectra (500 MHz) of Pierreione A (1) in CDCl<sub>3</sub>

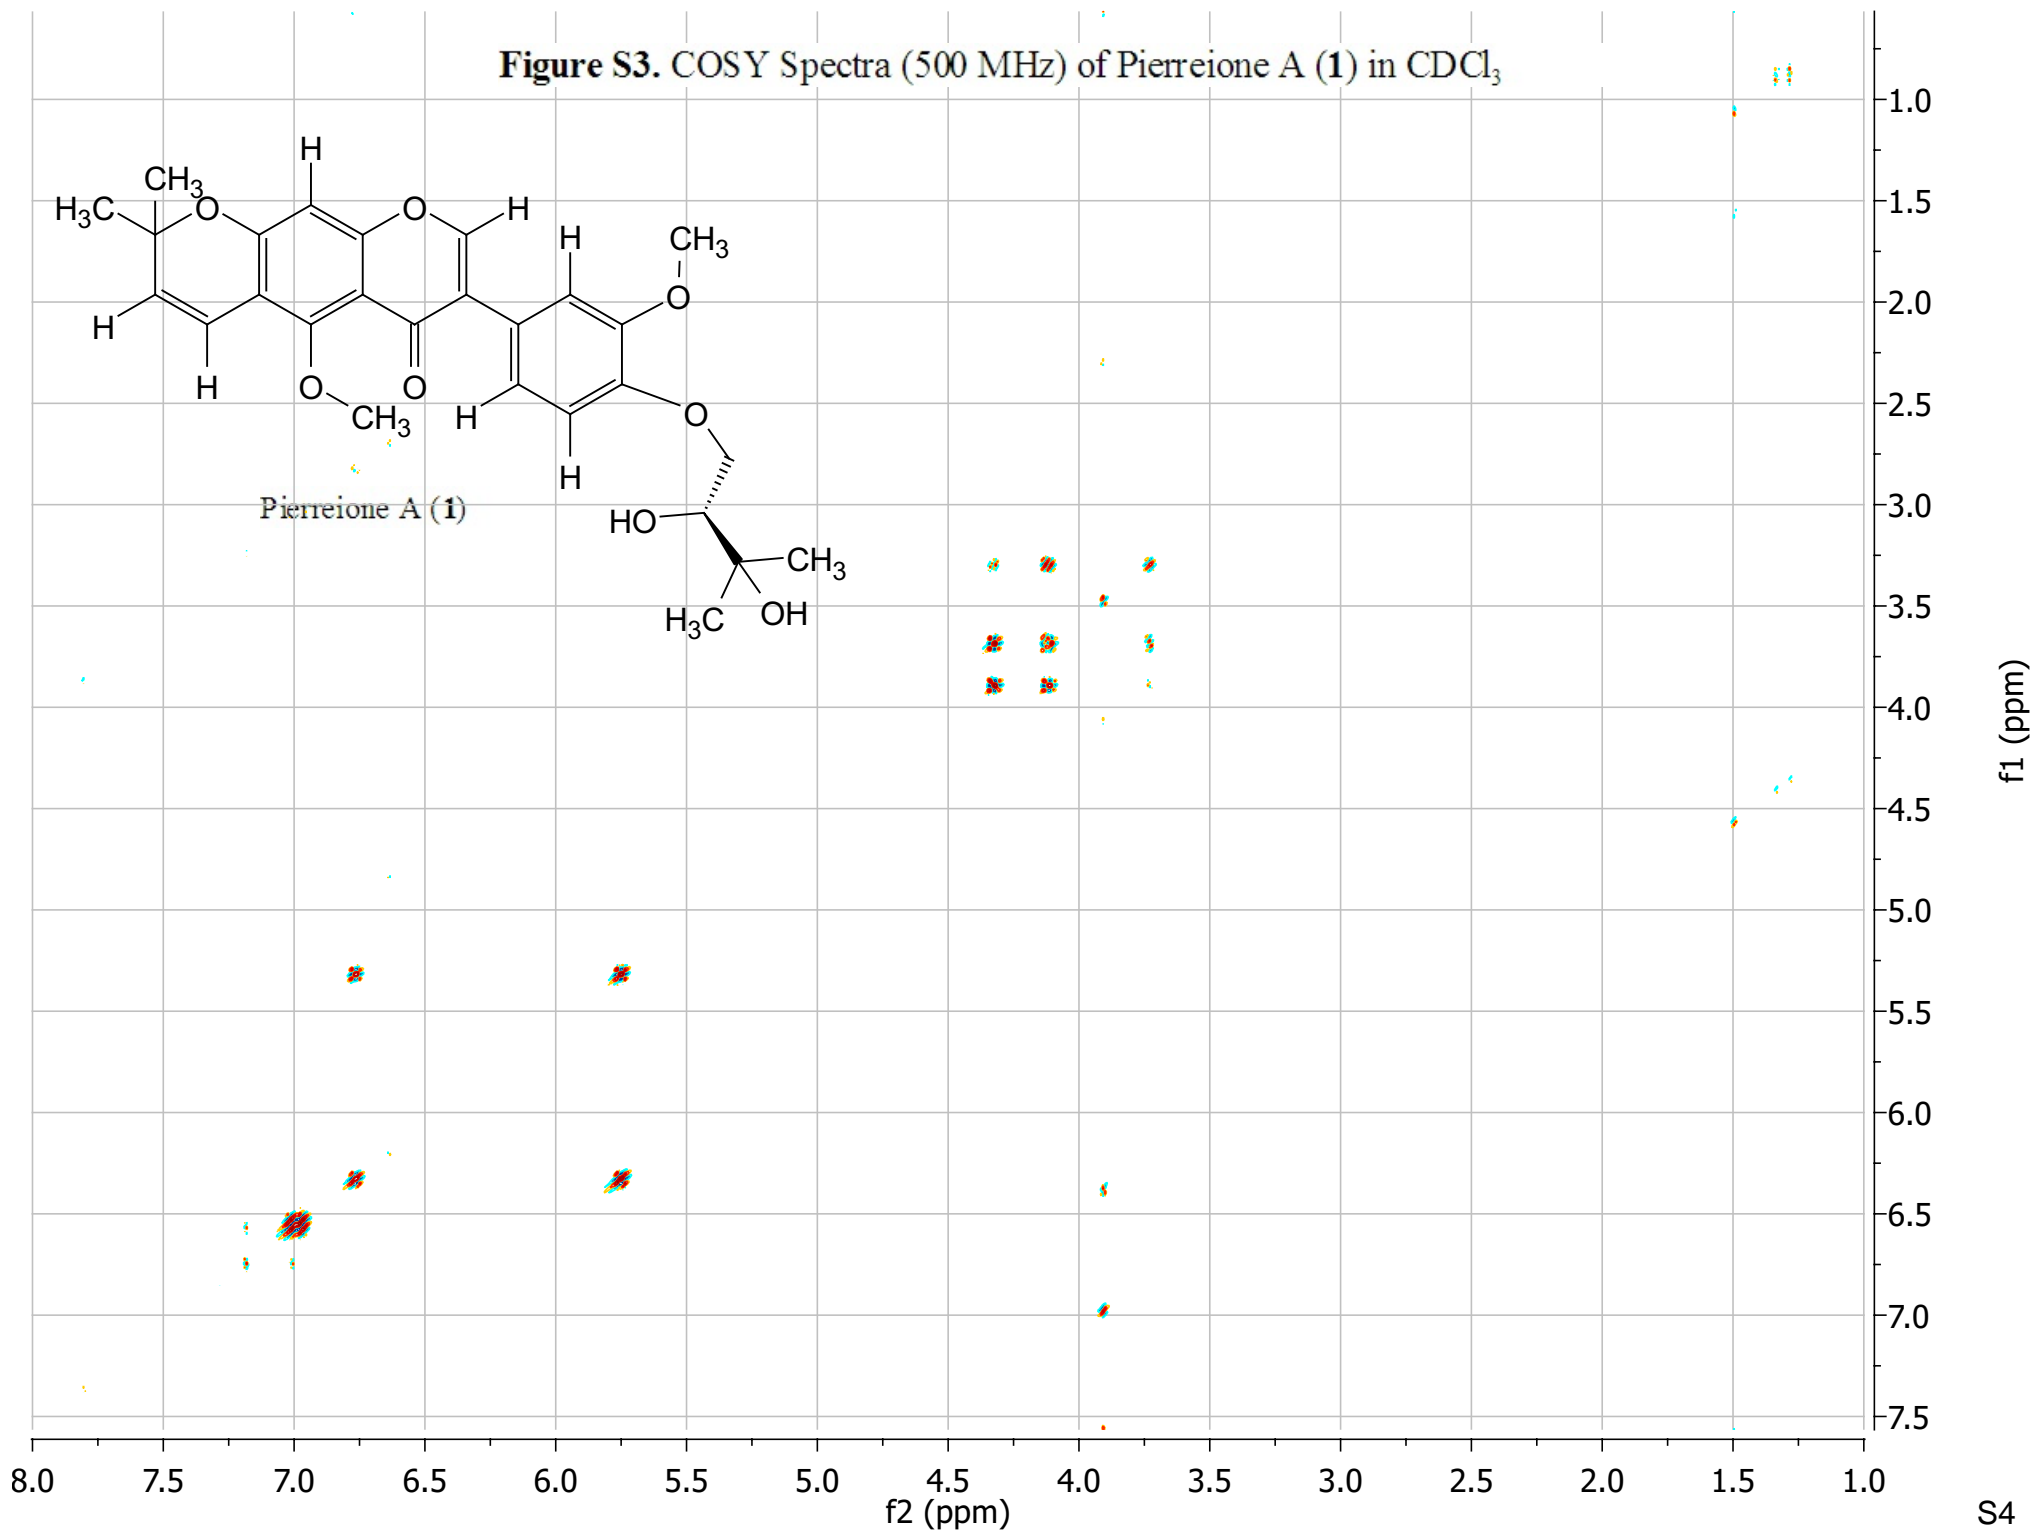

Figure S4. HSQC Spectra (500 MHz) of Pierreione A (1) in CDCl<sub>3</sub>

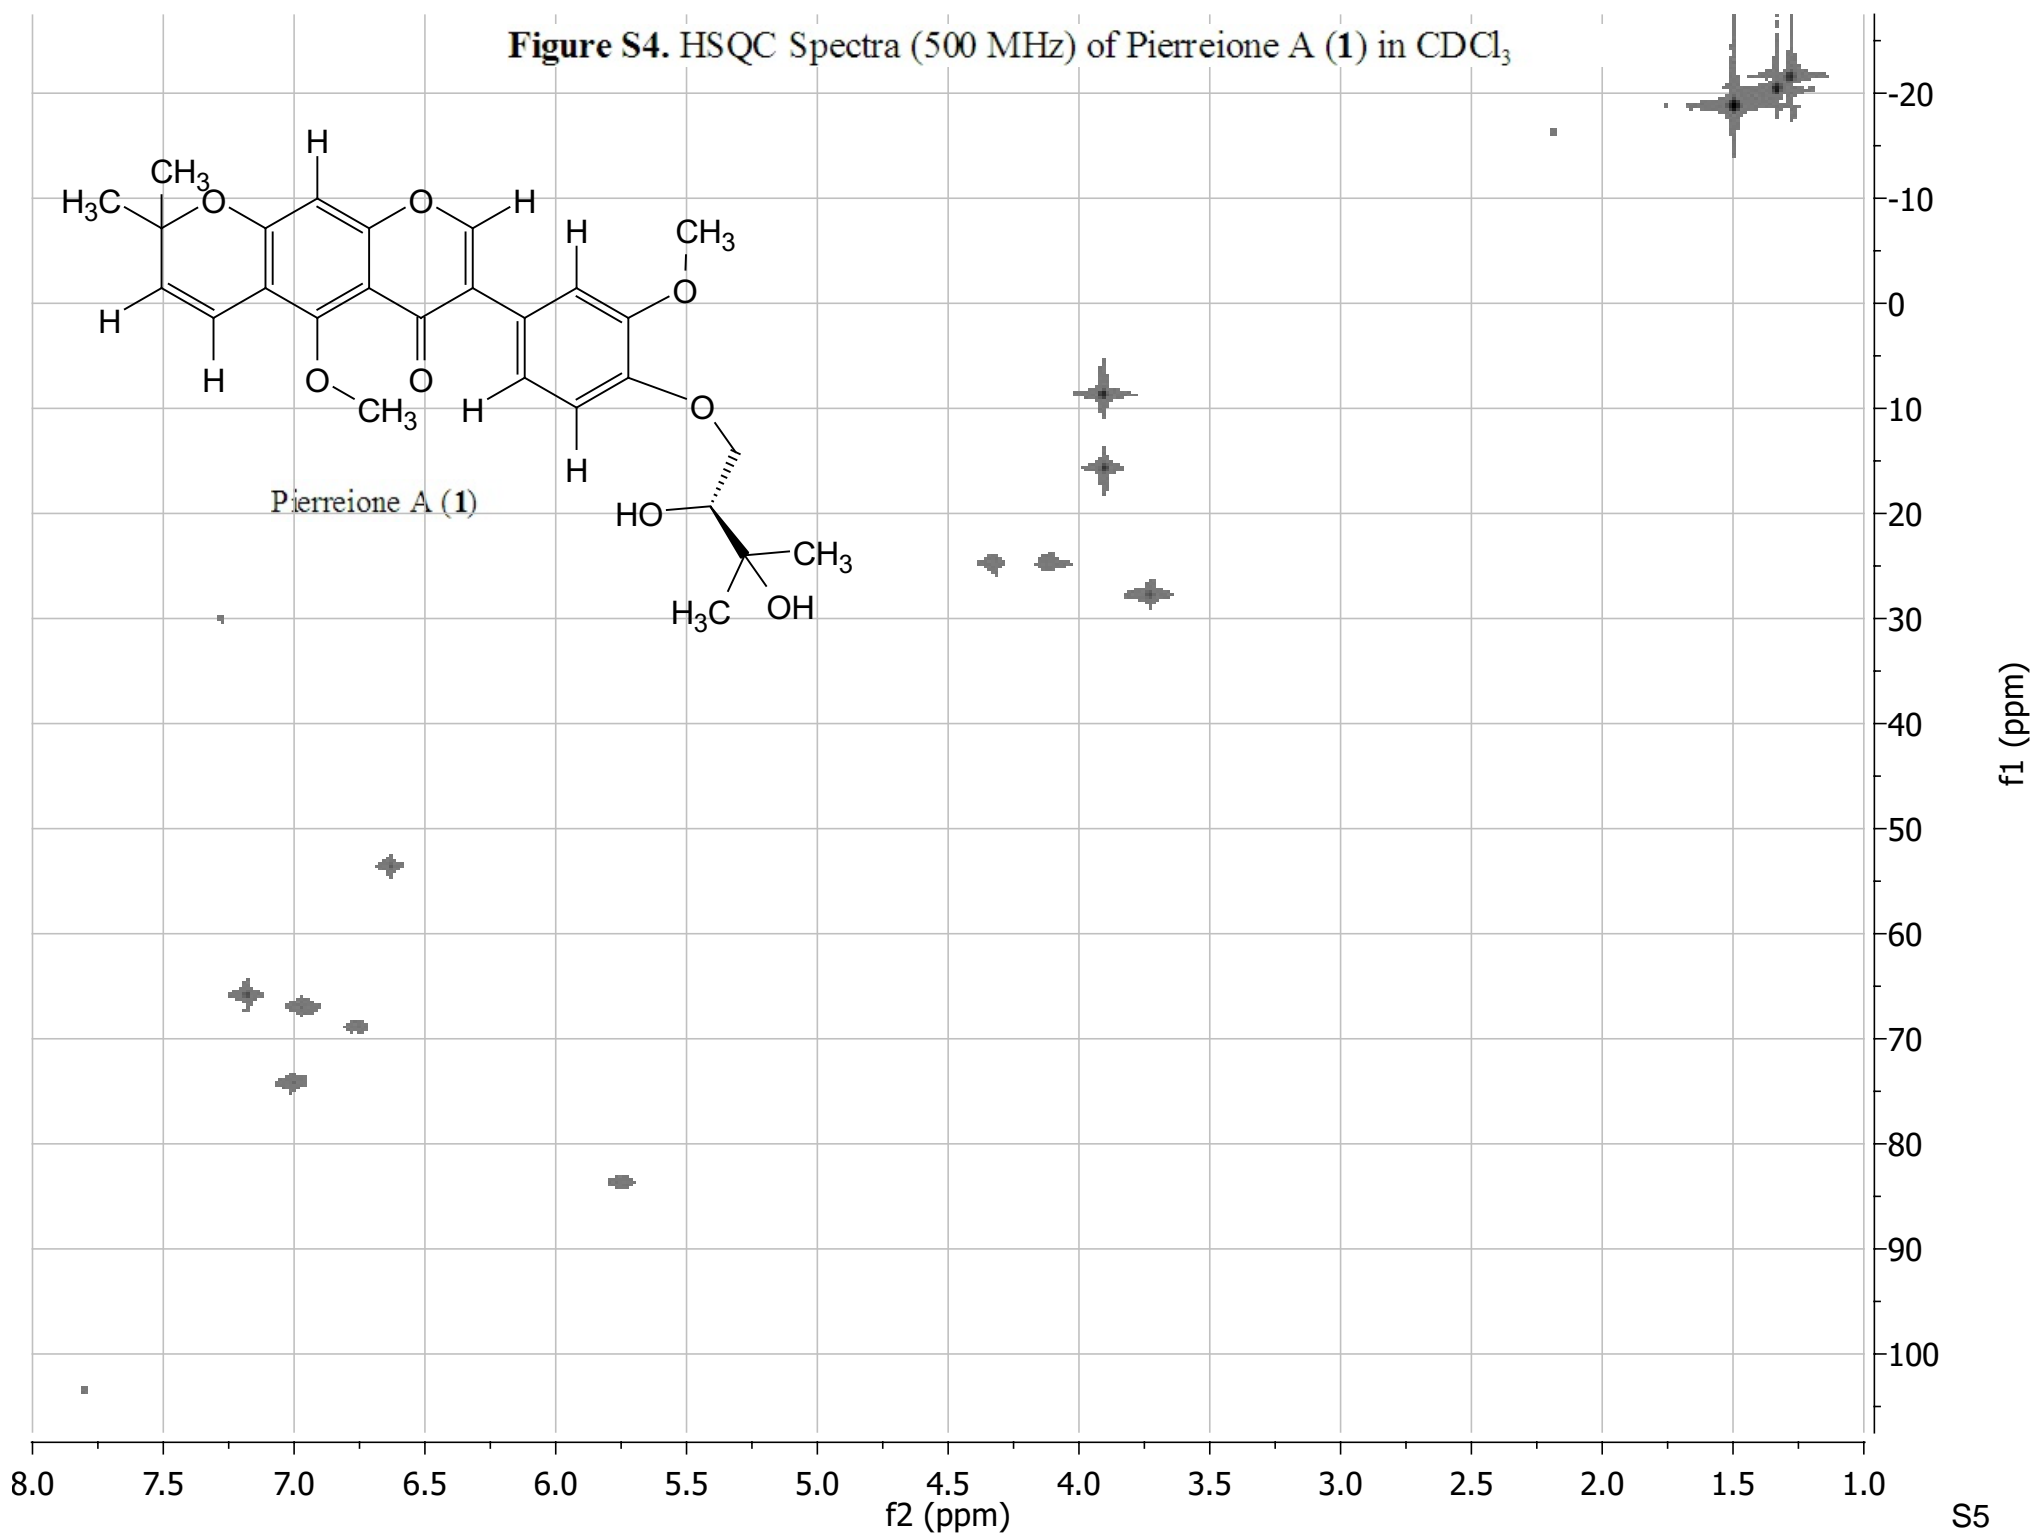

Figure S5. HMBC Spectra (500 MHz) of Pierreione A (1) in CDCl<sub>3</sub>

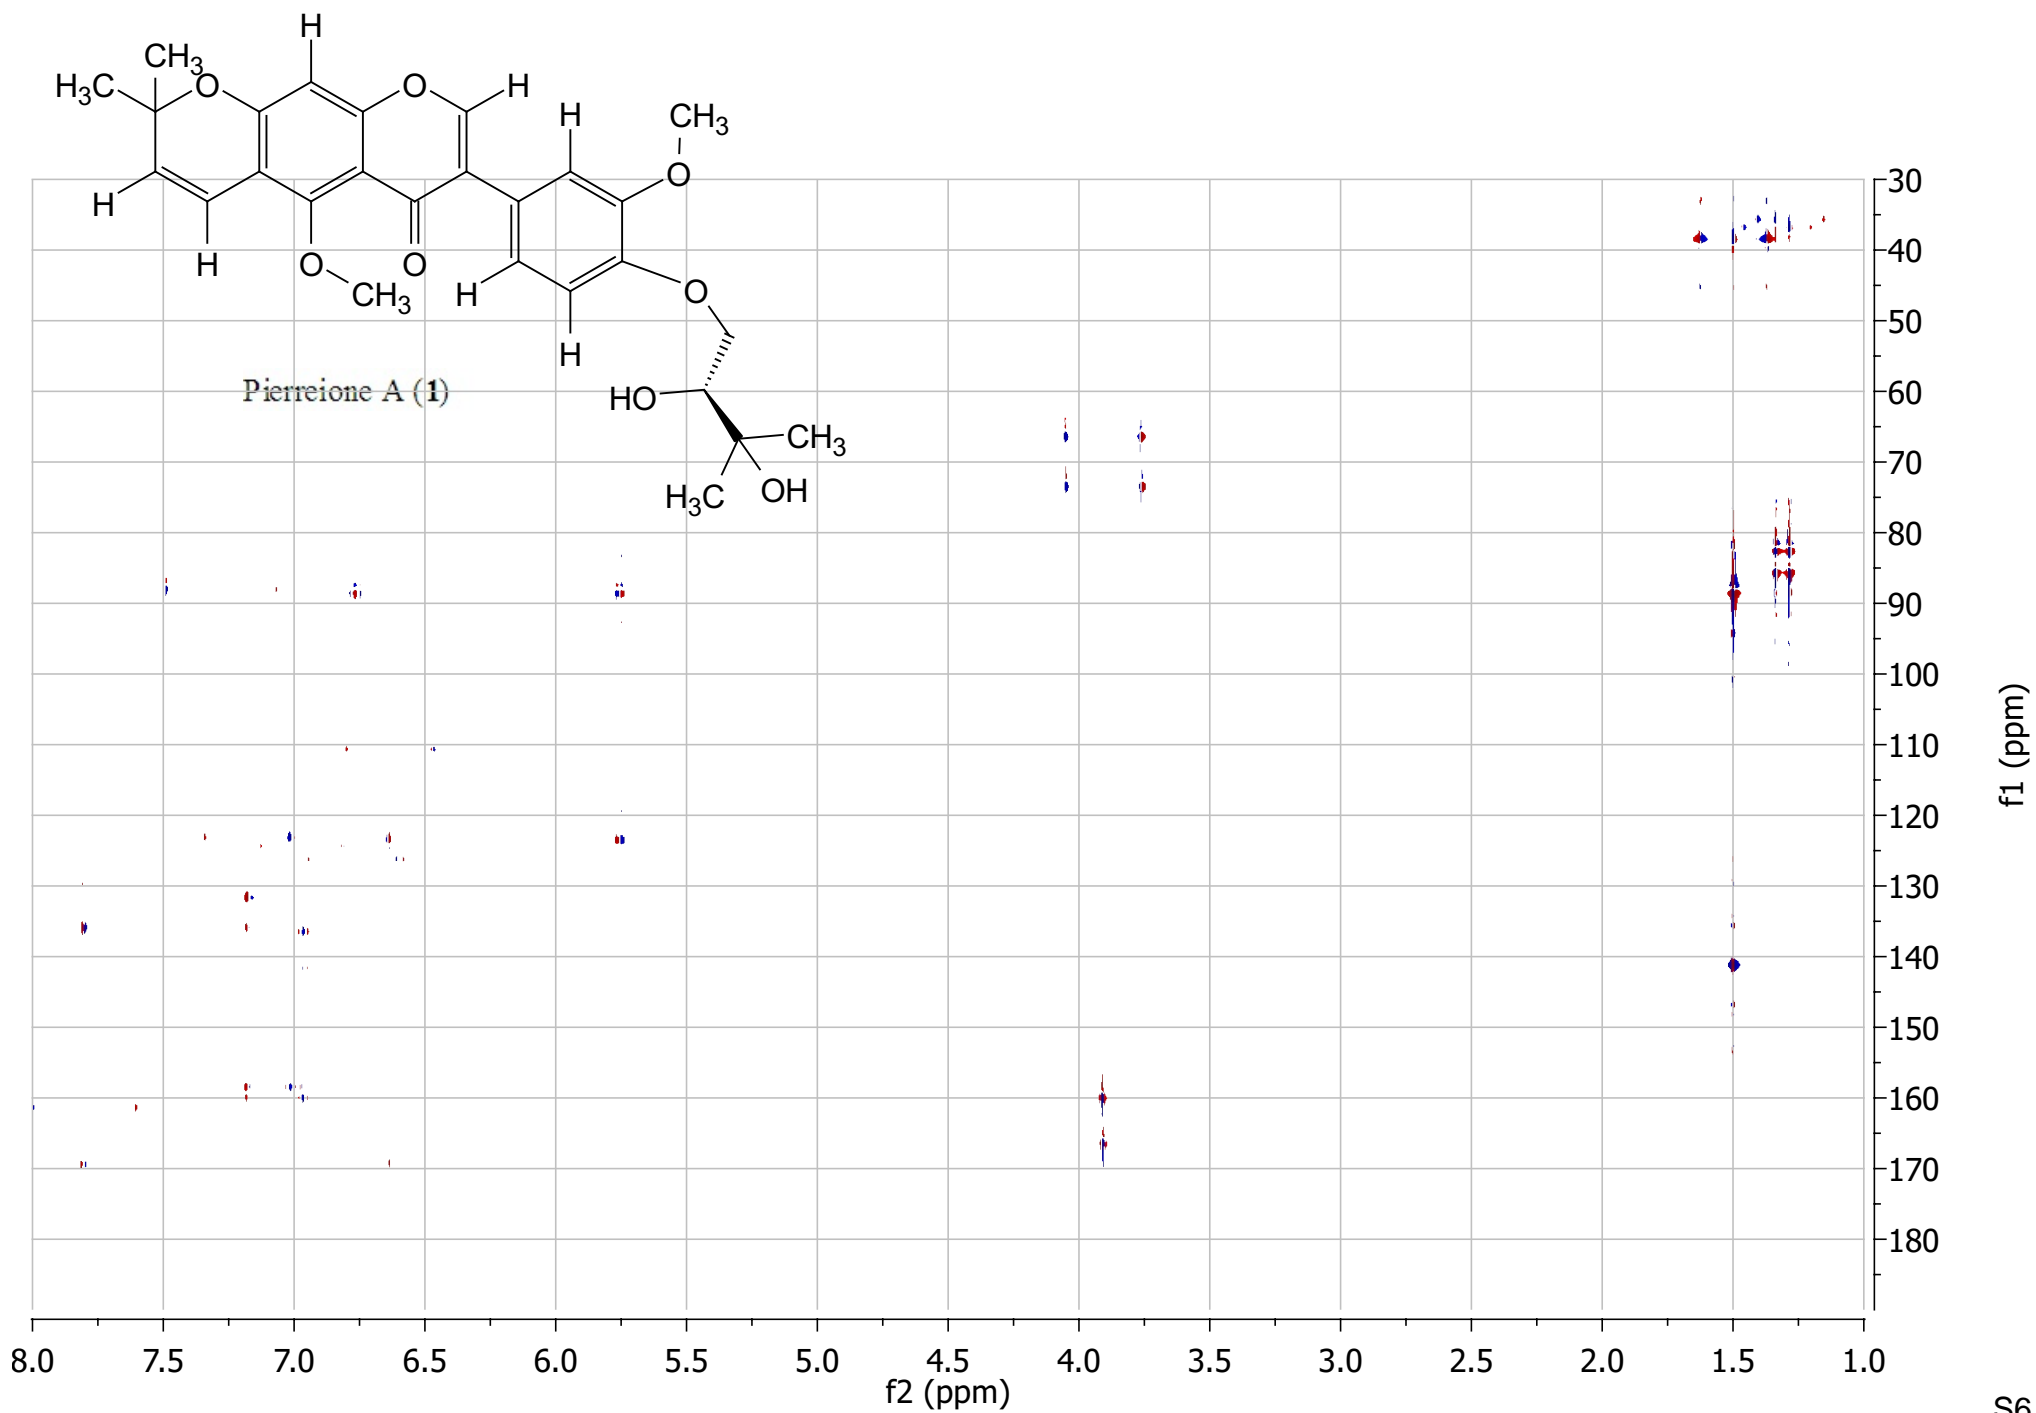

**Figure S6.**  $^1\text{H}$  NMR Spectrum (500 MHz) of Pierreione B (2) in  $\text{CDCl}_3$

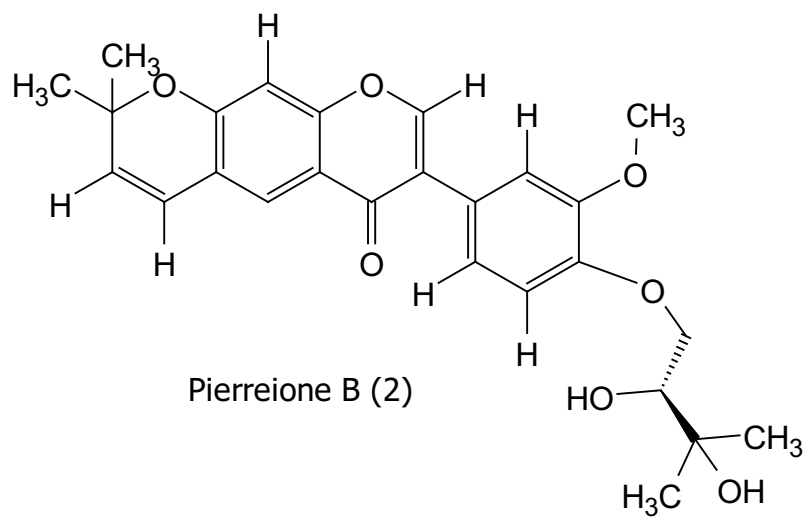

Pierreione B (2)

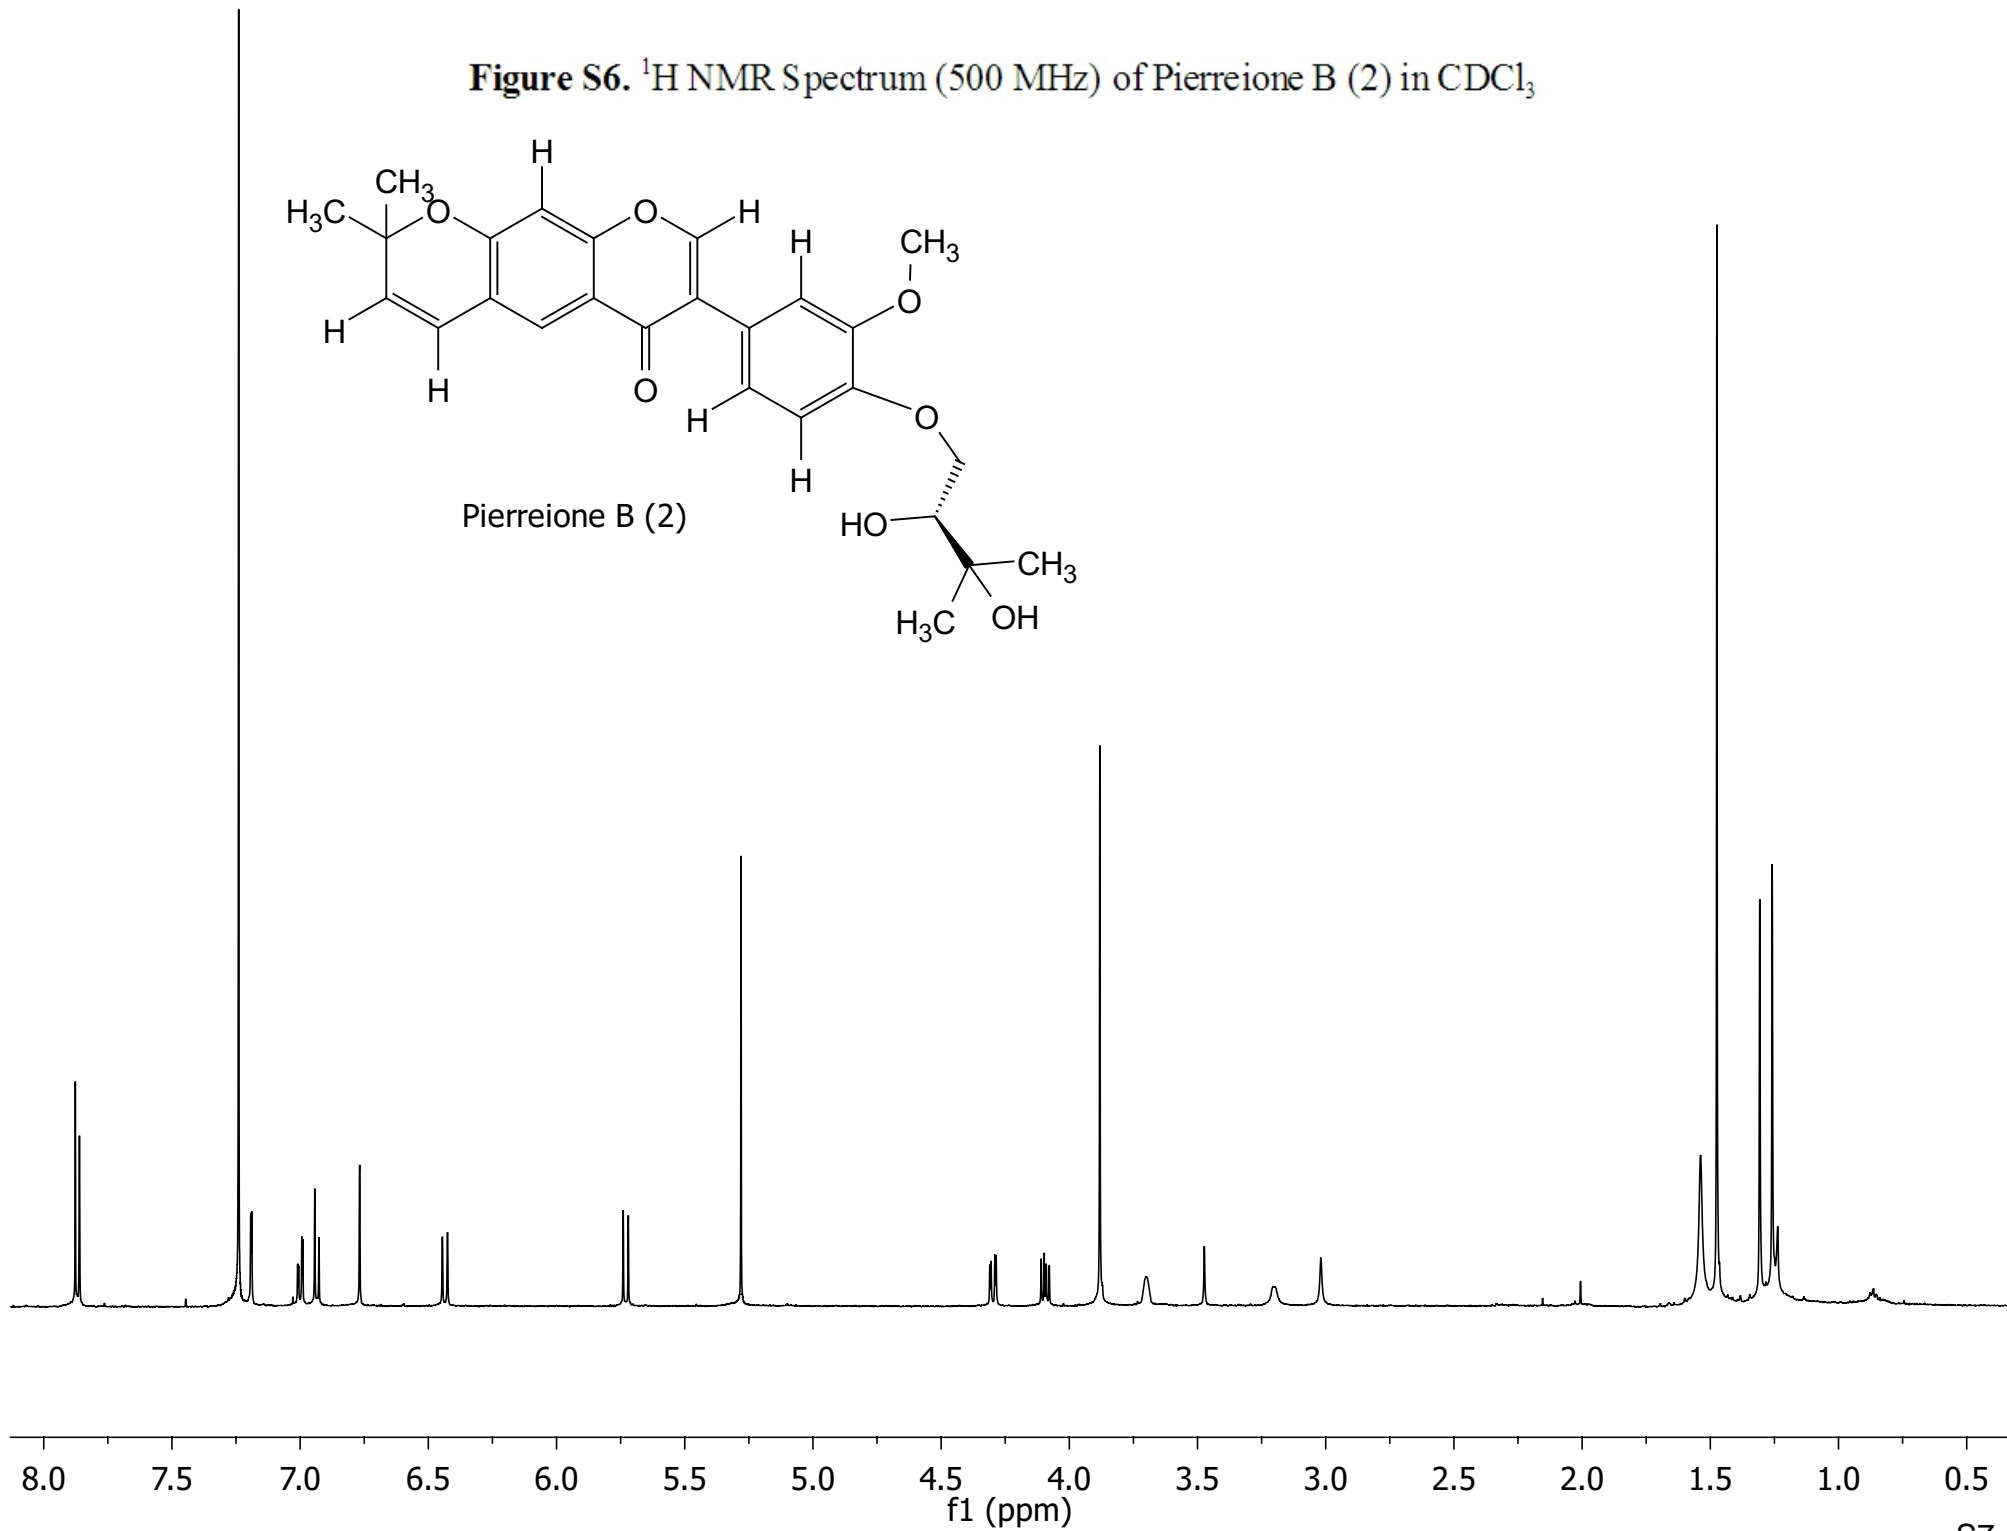



Figure S7.  $^{13}\text{C}$  NMR Spectrum (125 MHz) of Pierreione B (2) in  $\text{CDCl}_3$

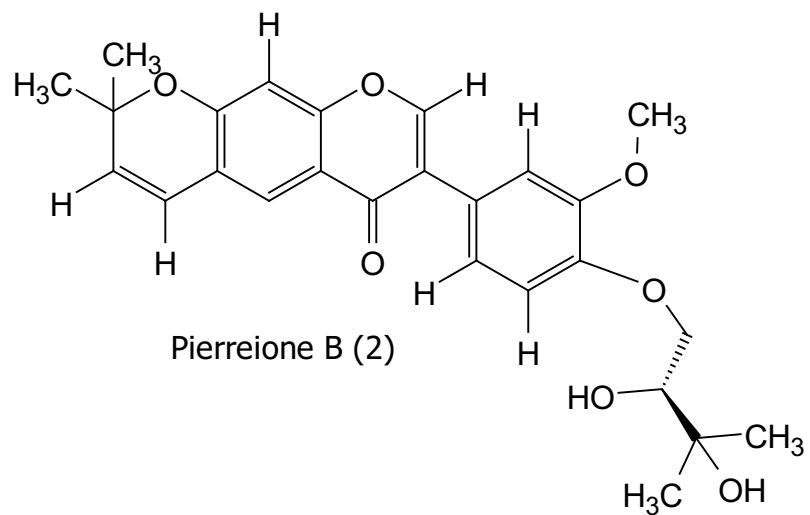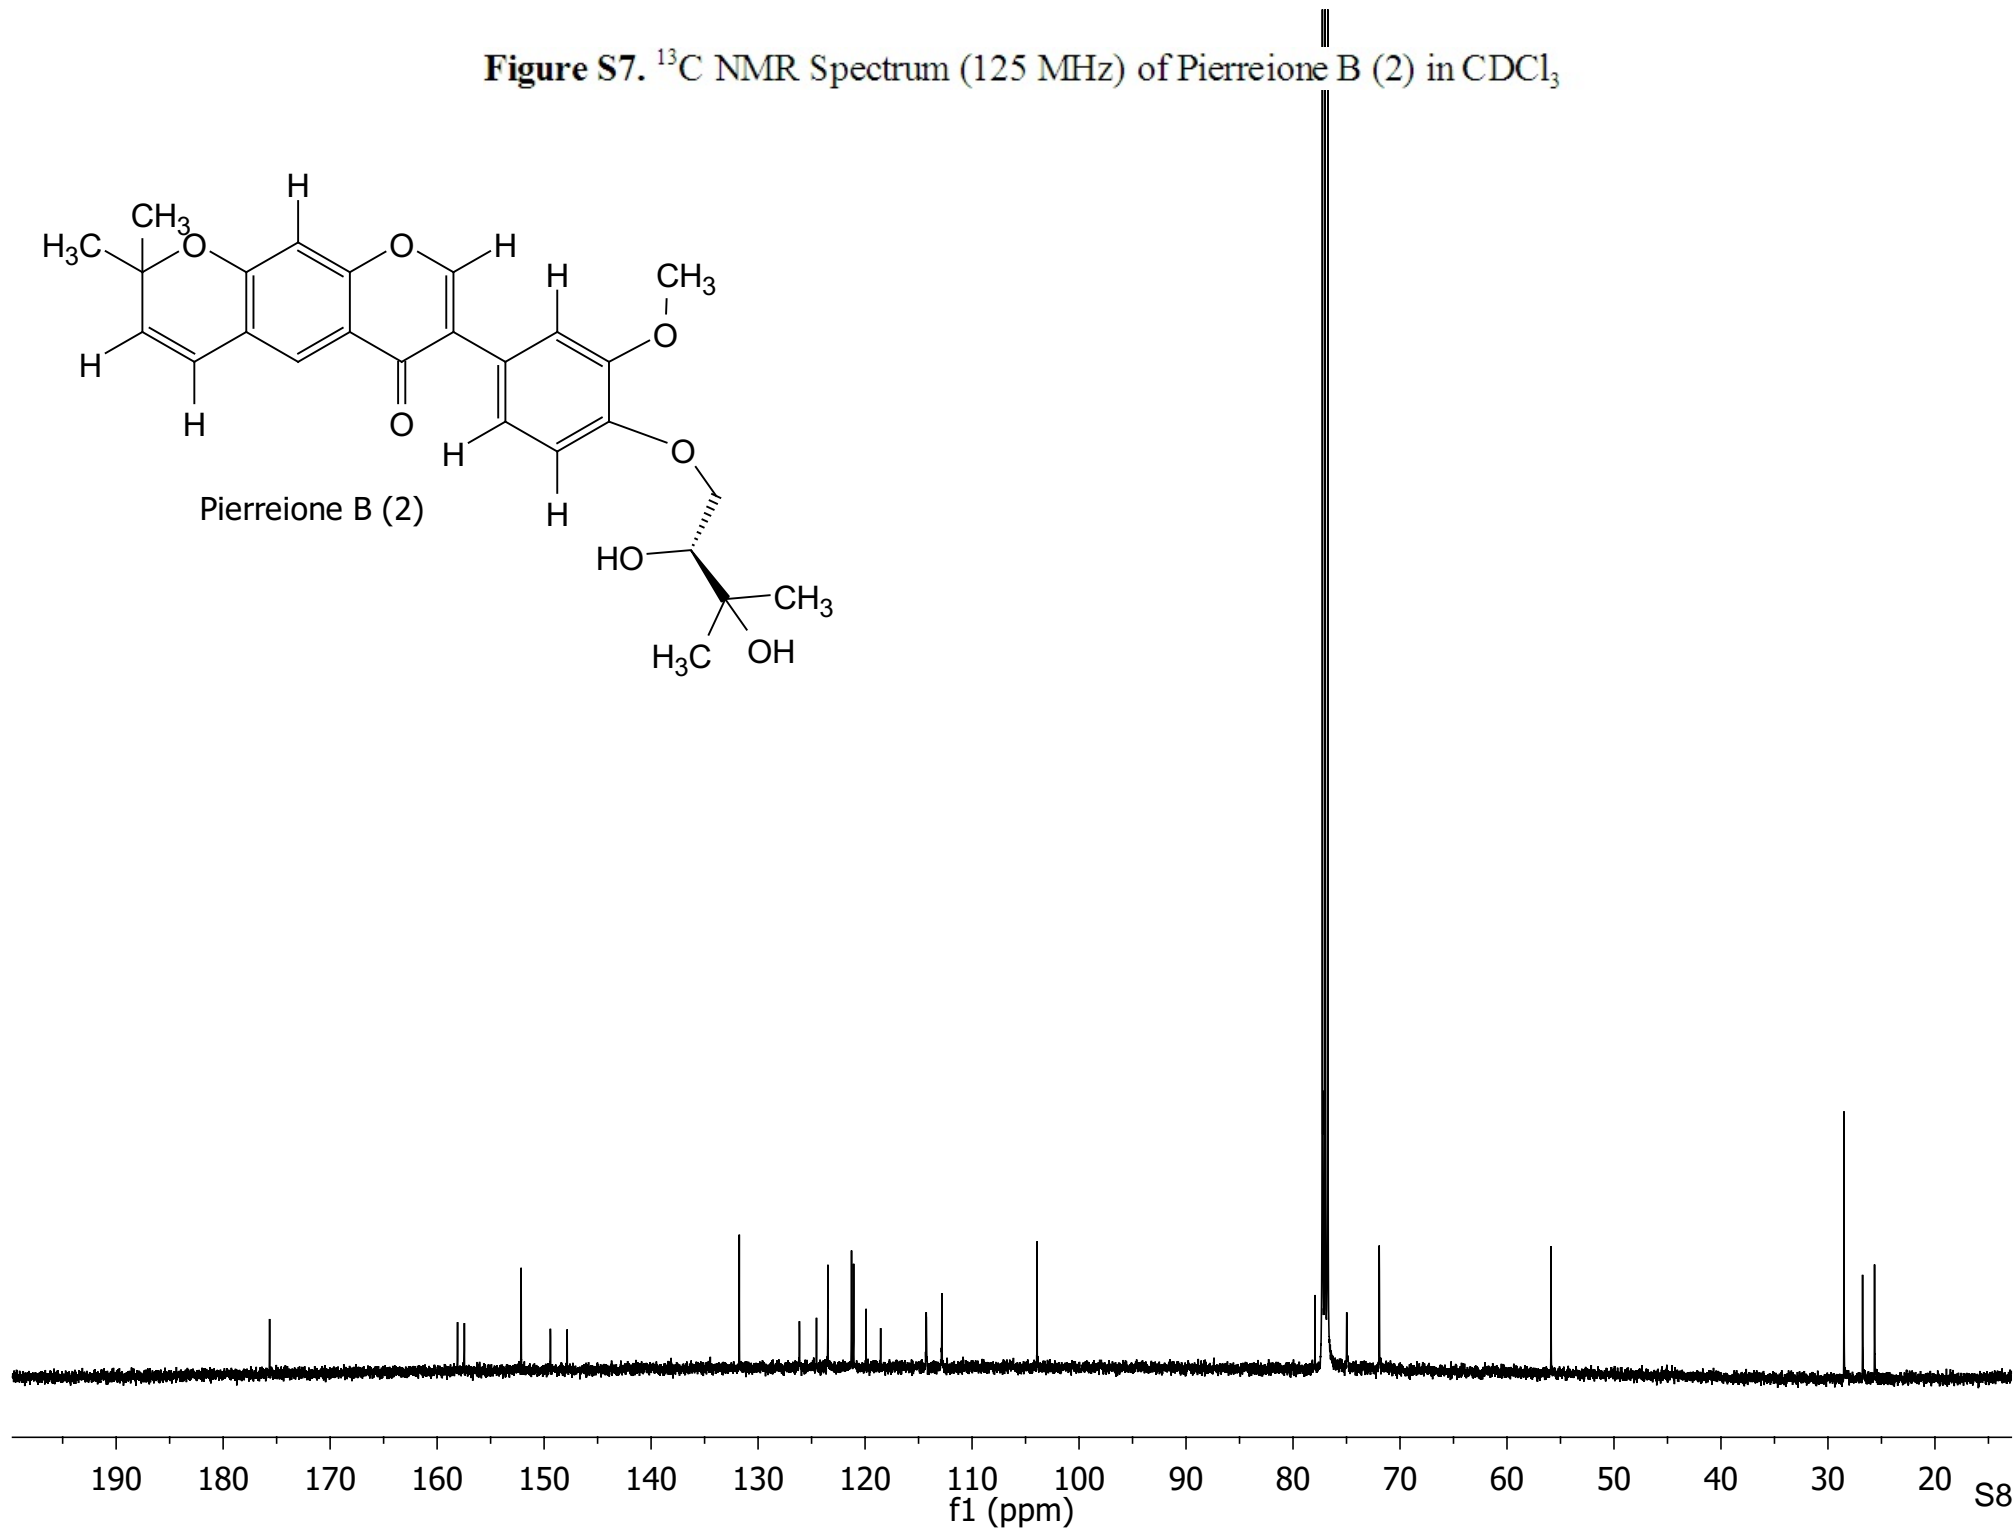

Figure S8.  $^1\text{H}$  NMR Spectrum (400 MHz) of Pierreione C (3) in  $\text{CDCl}_3$

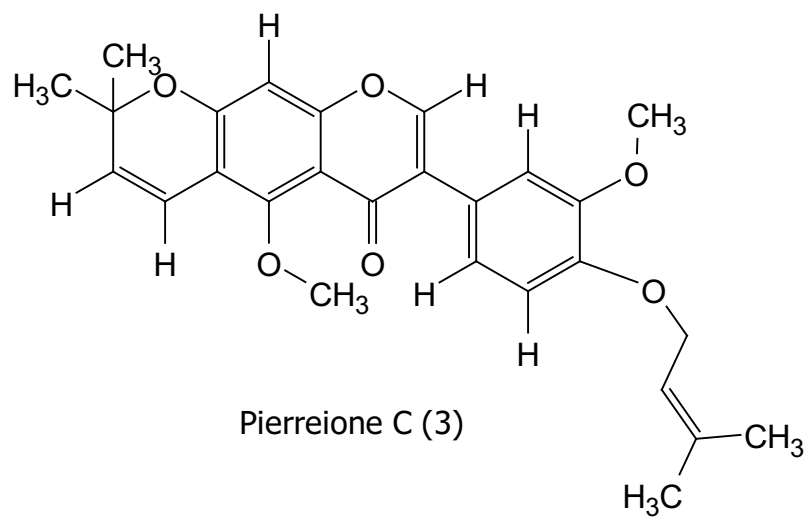

Pierreione C (3)

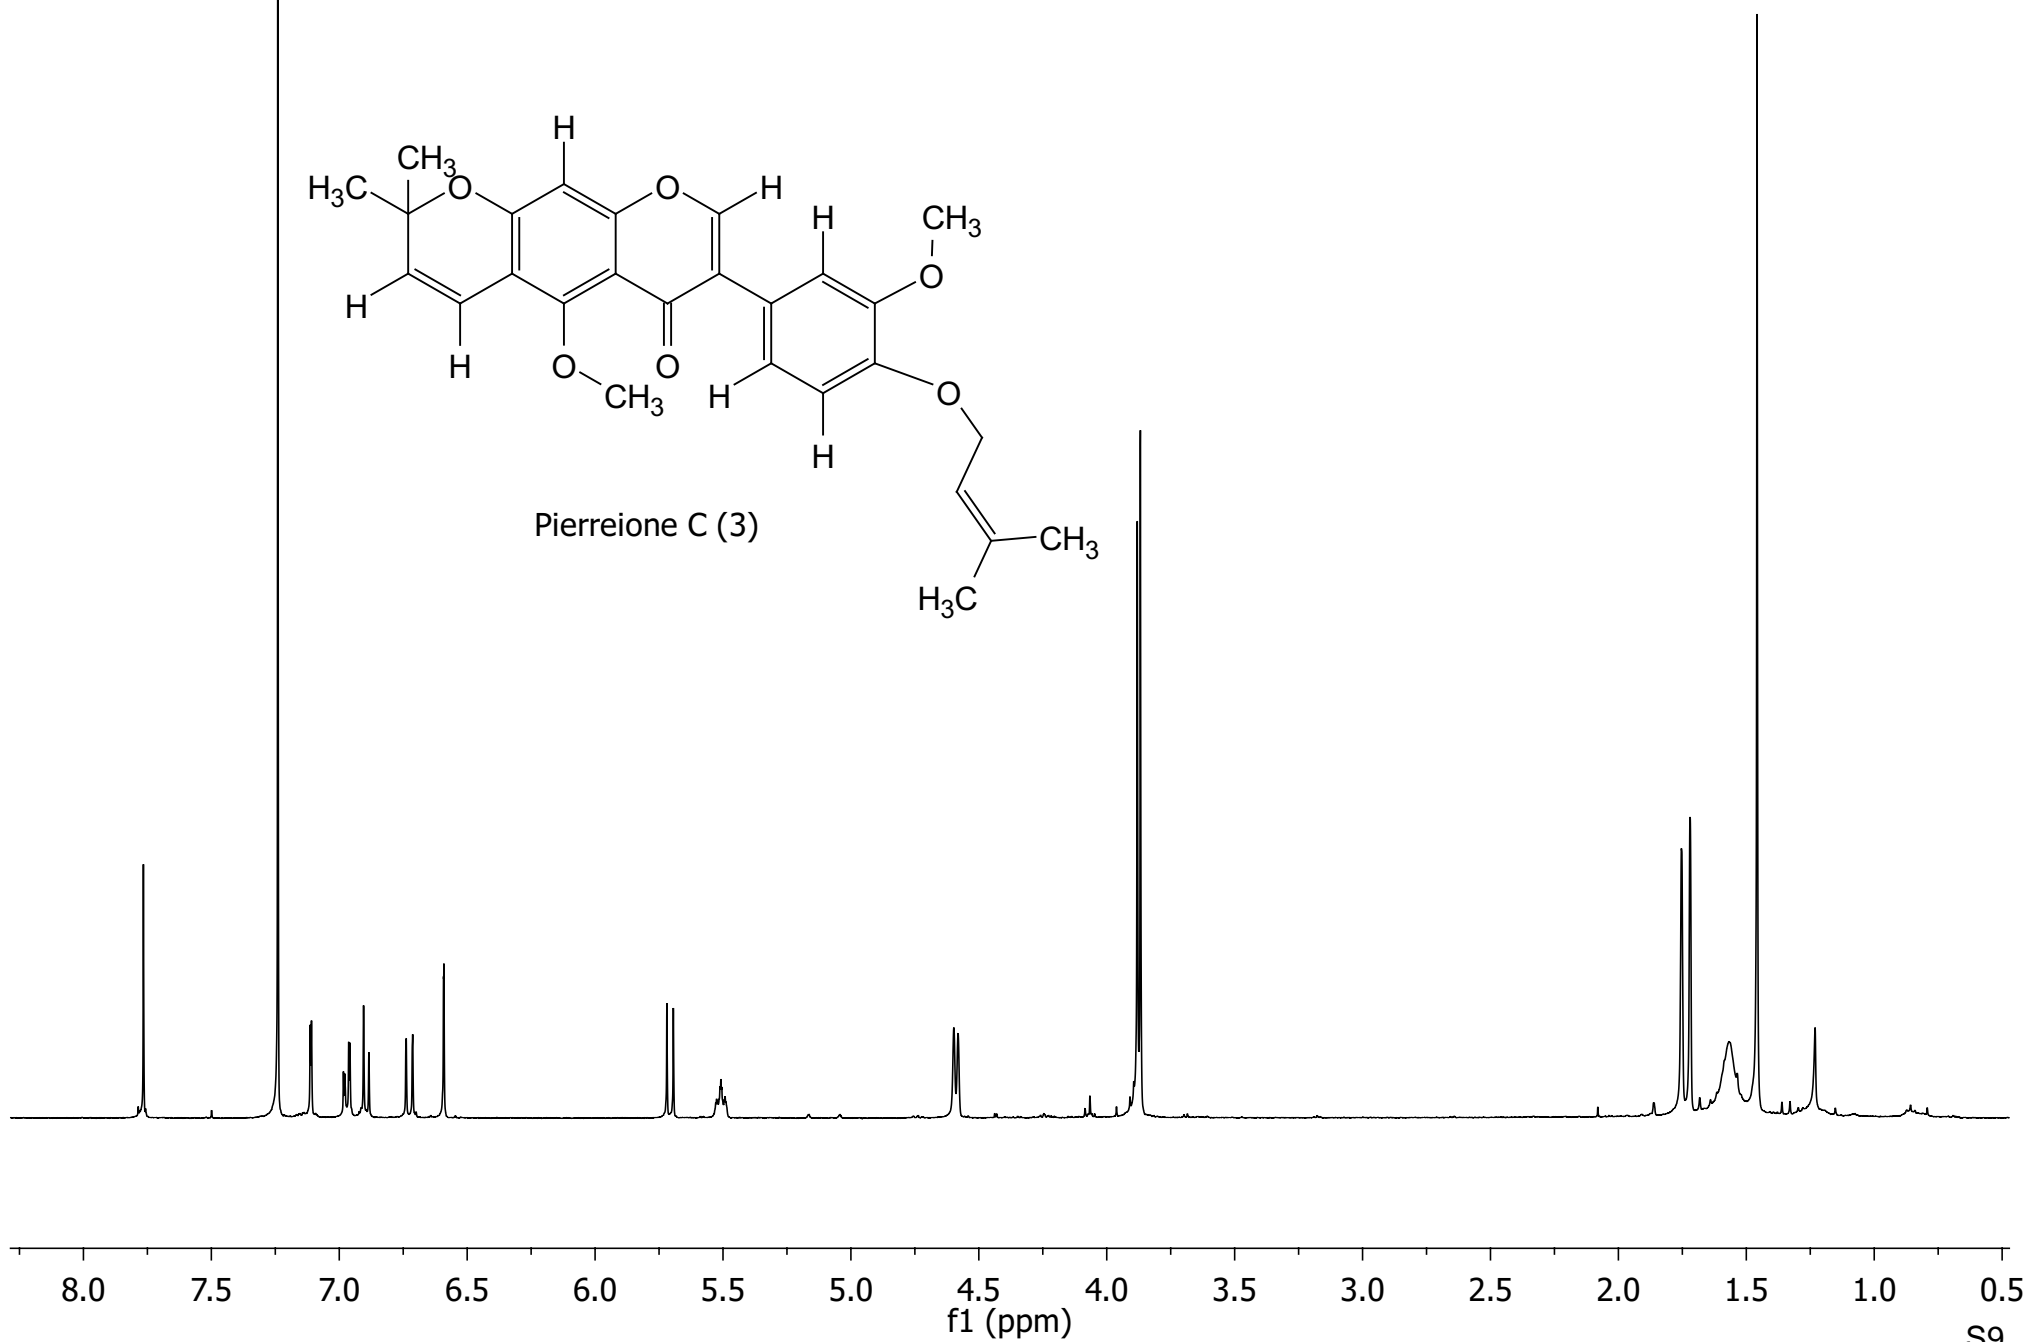

Figure S9.  $^{13}\text{C}$  NMR Spectrum (100 MHz) of Pierreione C (3) in  $\text{CDCl}_3$

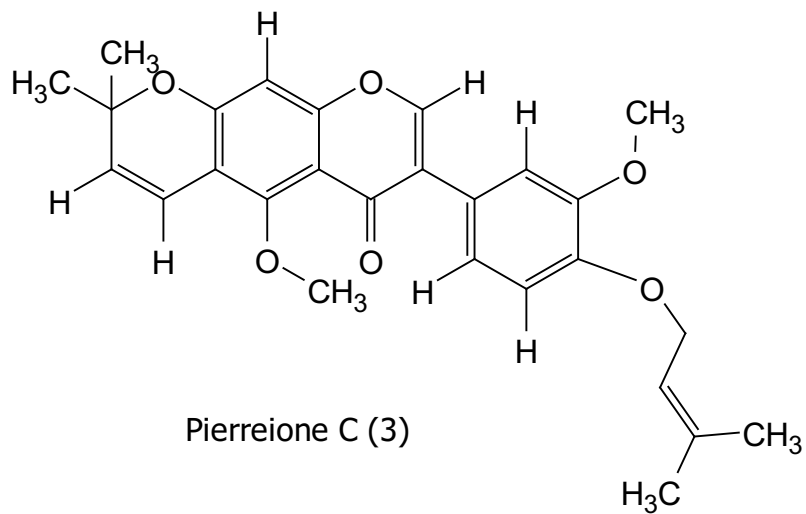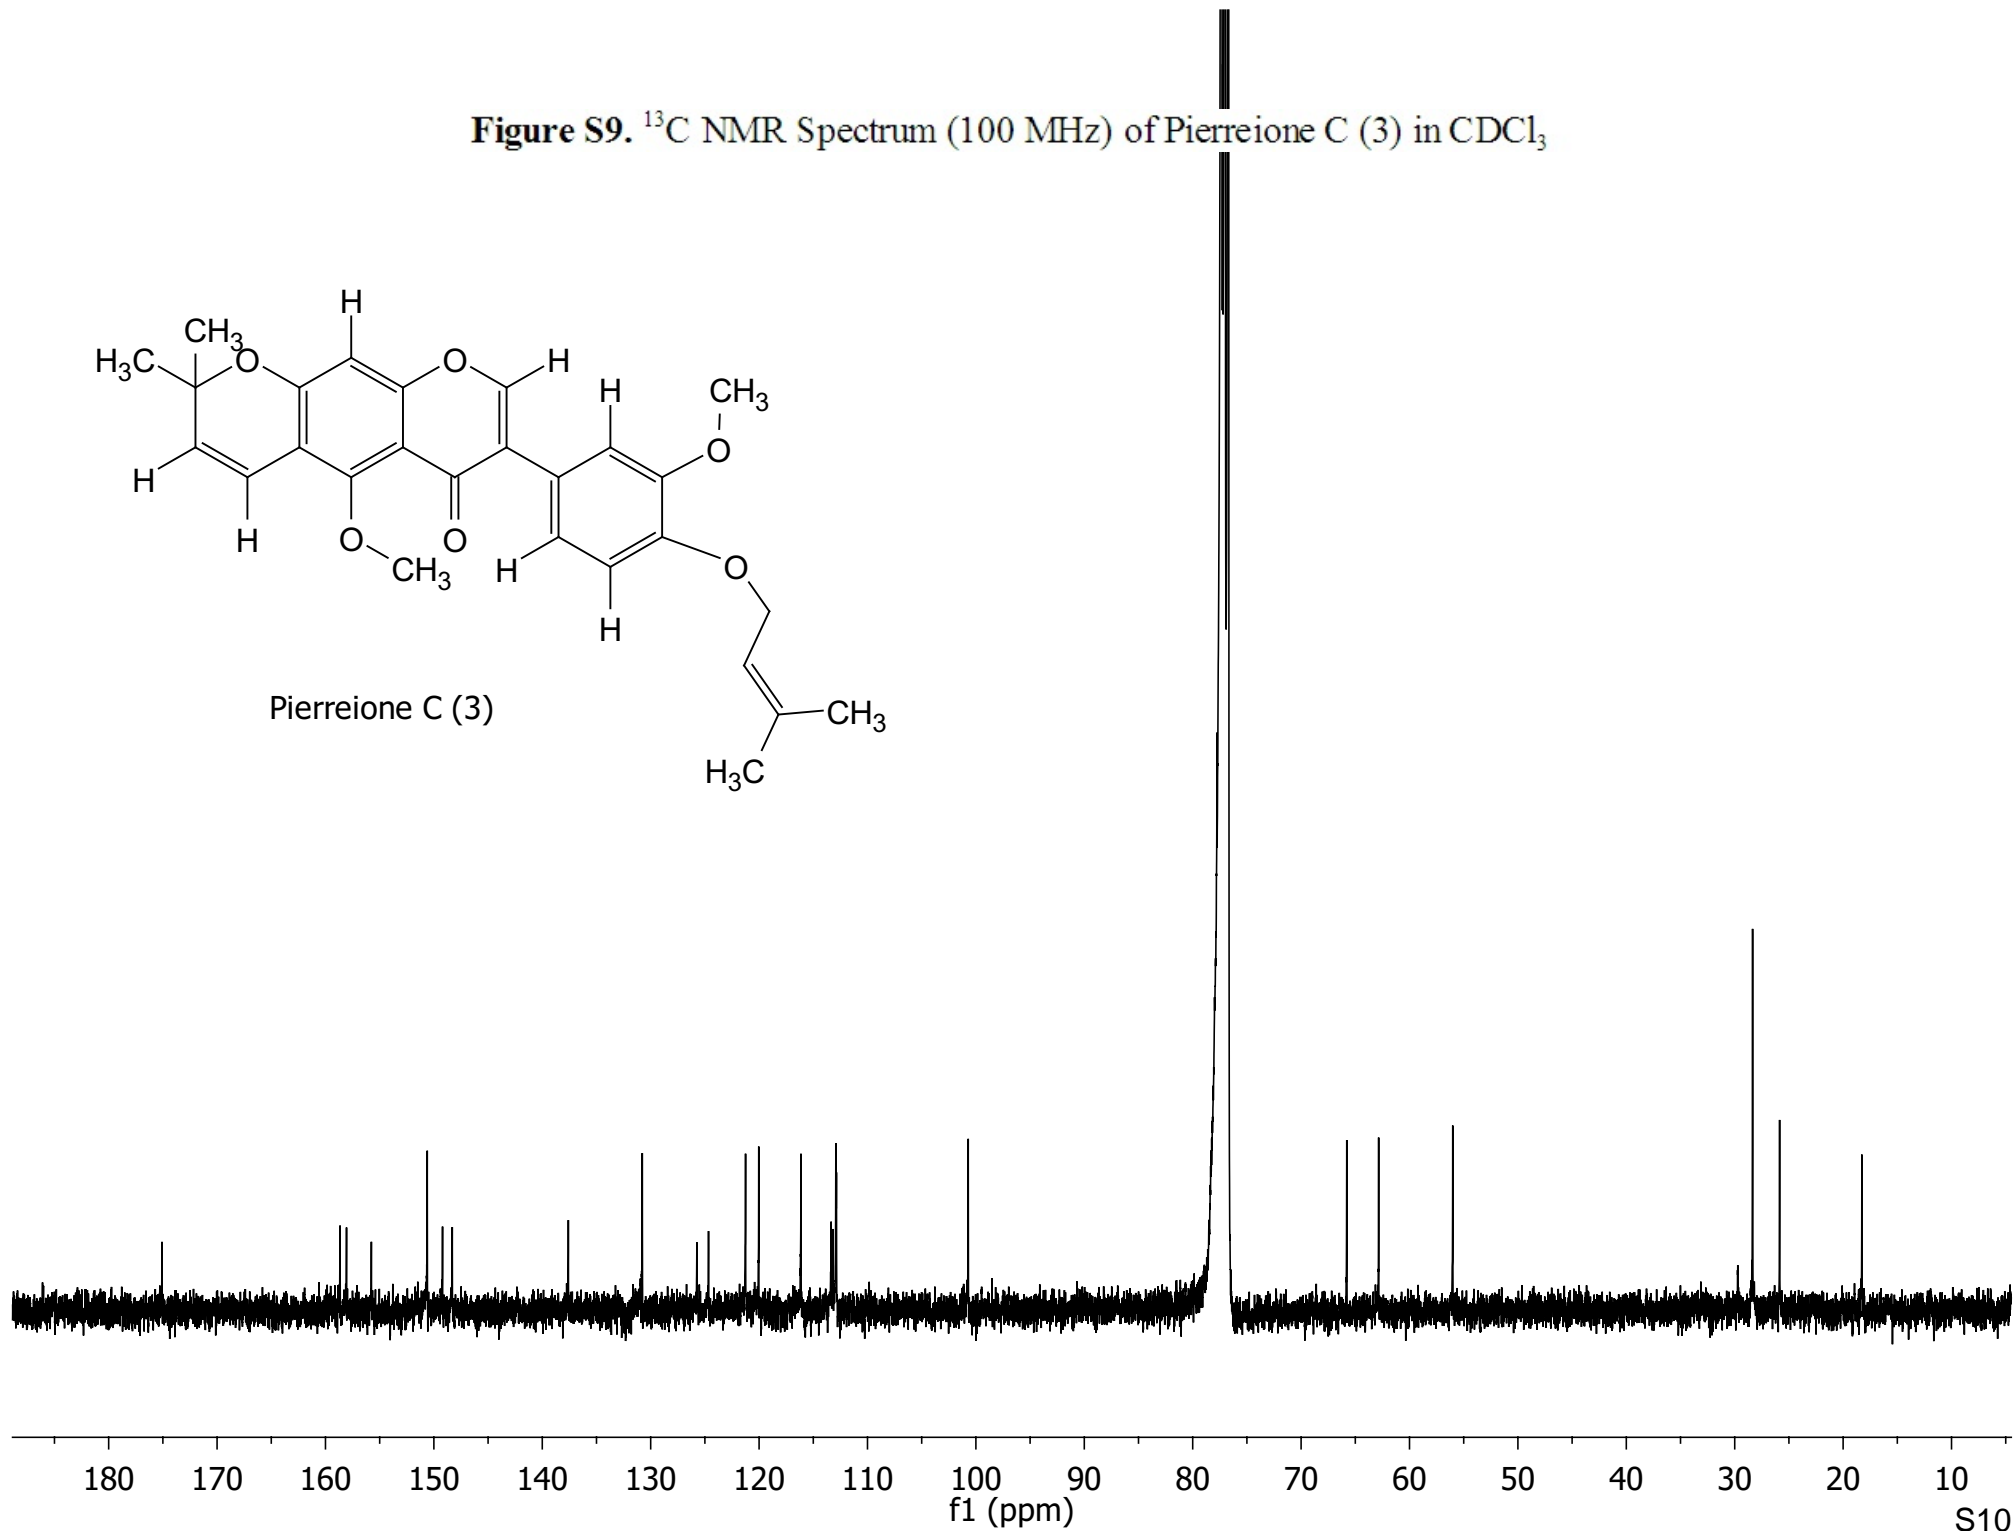

Figure S10.  $^1\text{H}$  NMR Spectrum (400 MHz) of Pierreione D (4) in  $\text{CDCl}_3$

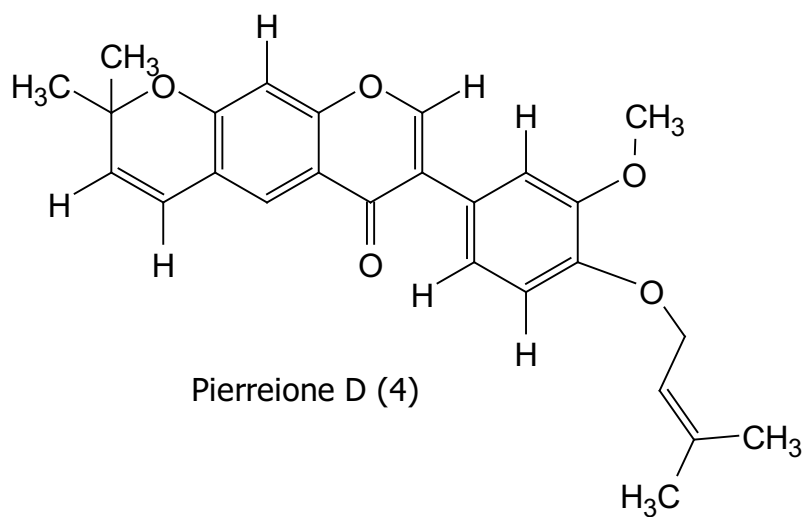

Pierreione D (4)

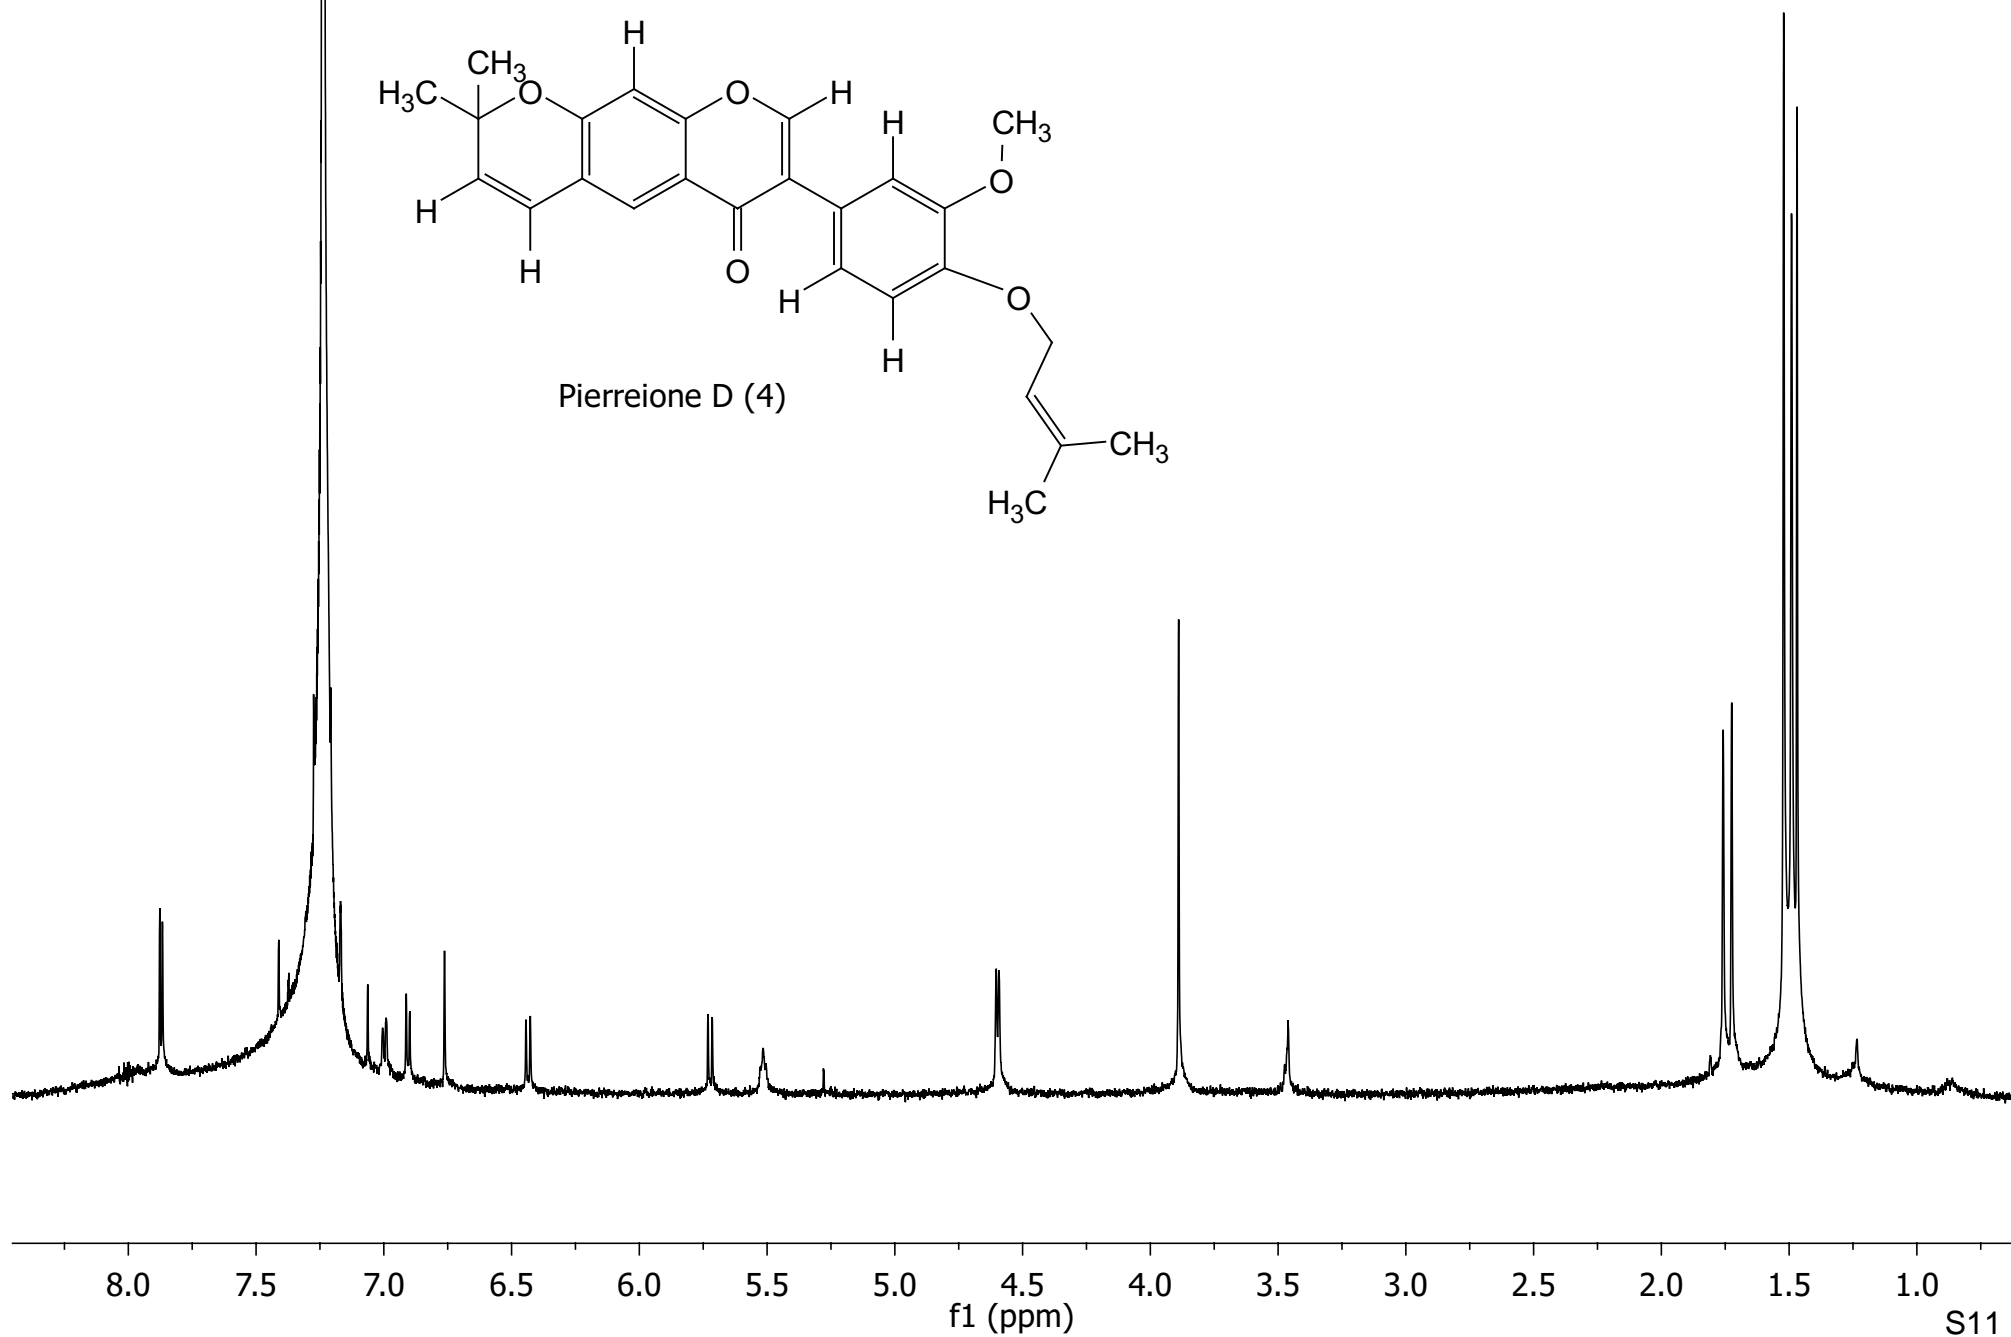

**Figure S11.**  $^1\text{H}$  NMR Spectrum (600 MHz) of Rotenone (5) in  $\text{CDCl}_3$

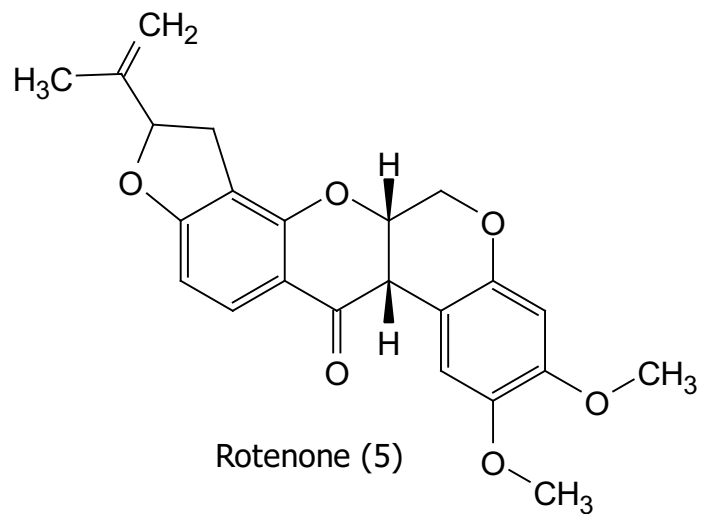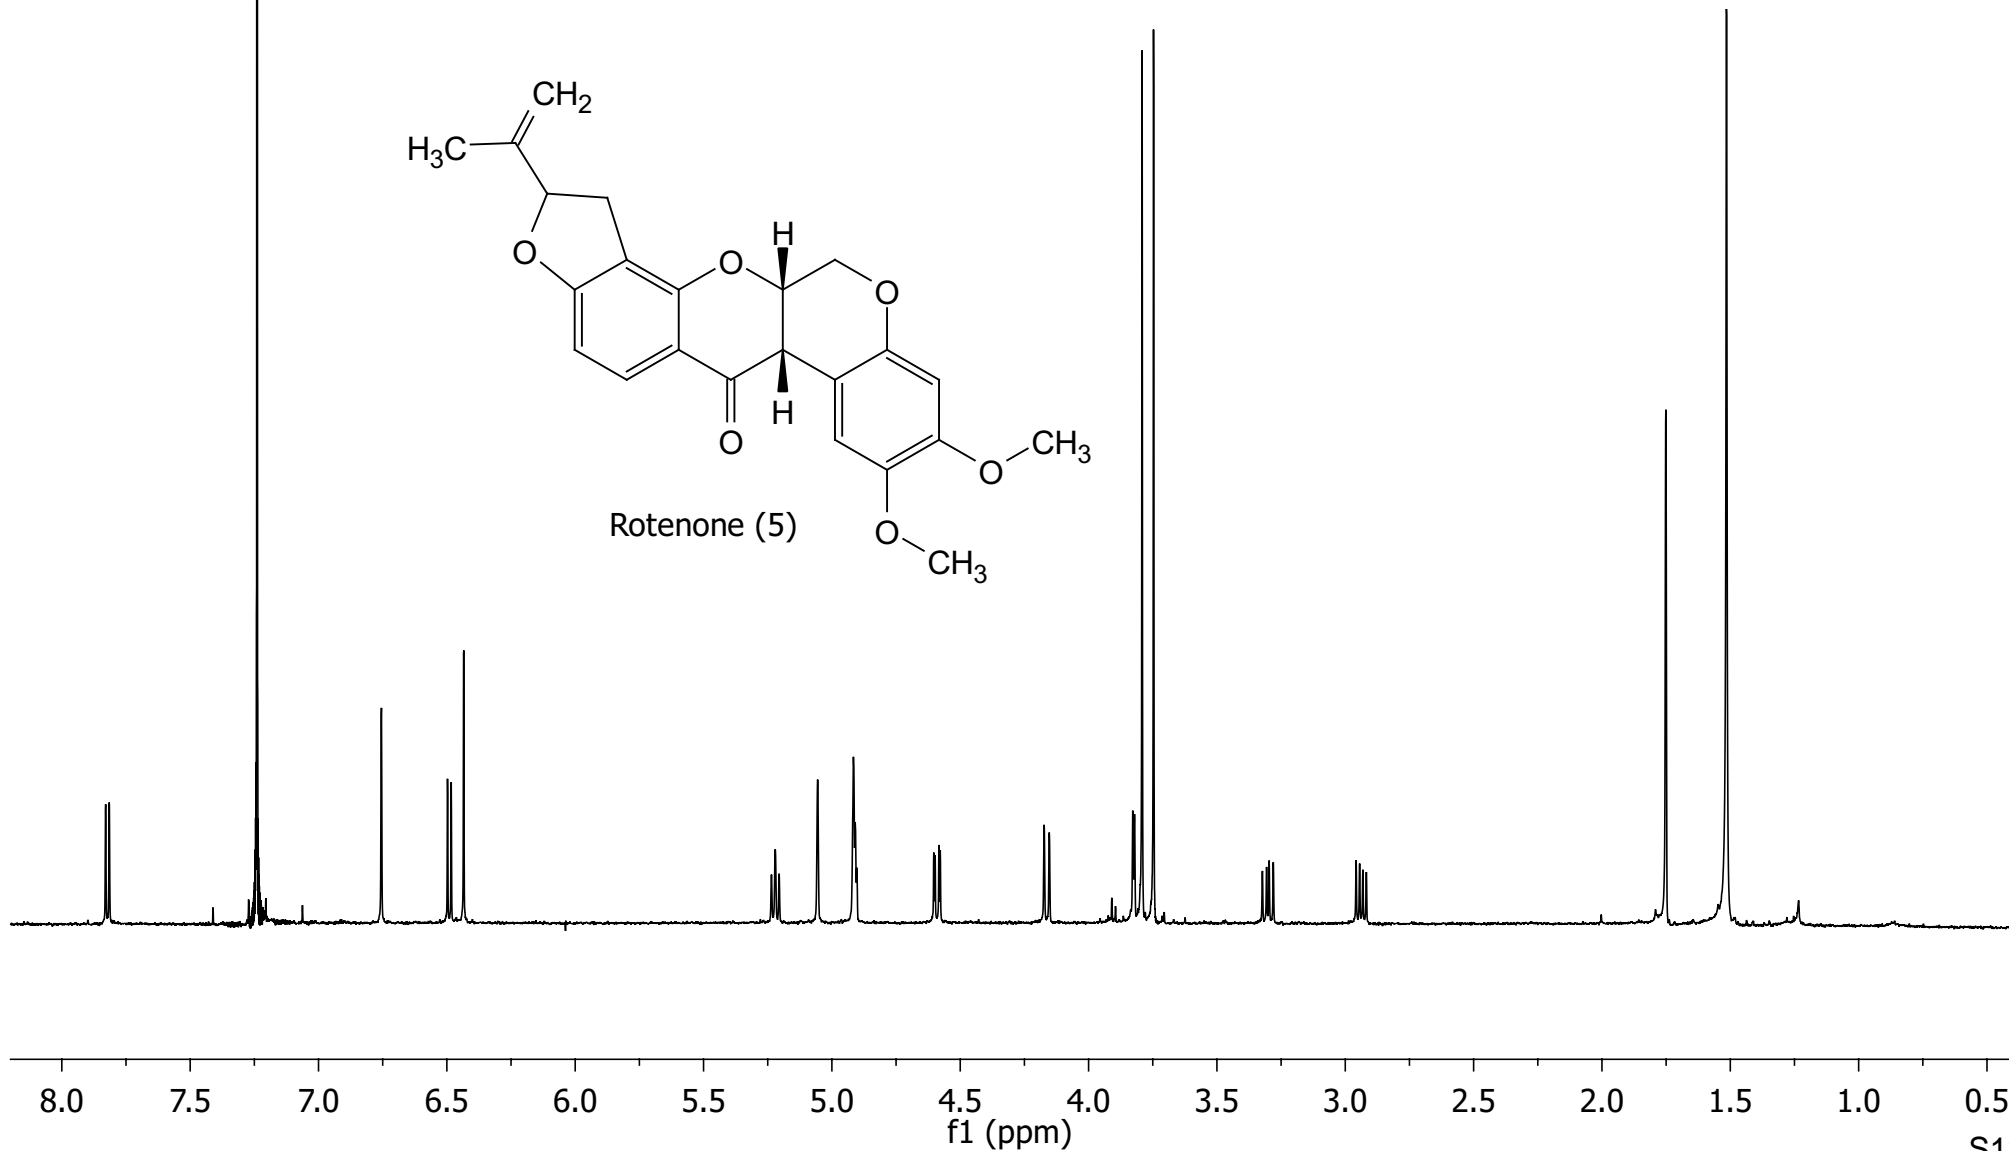

**Figure S12.**  $^1\text{H}$  NMR Spectrum (500 MHz) of 12a-Hydroxyrotenone (6) in  $\text{CDCl}_3$

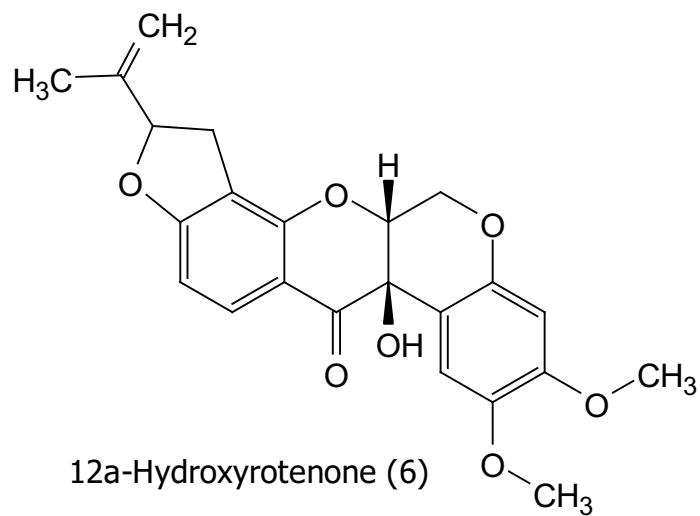

12a-Hydroxyrotenone (6)

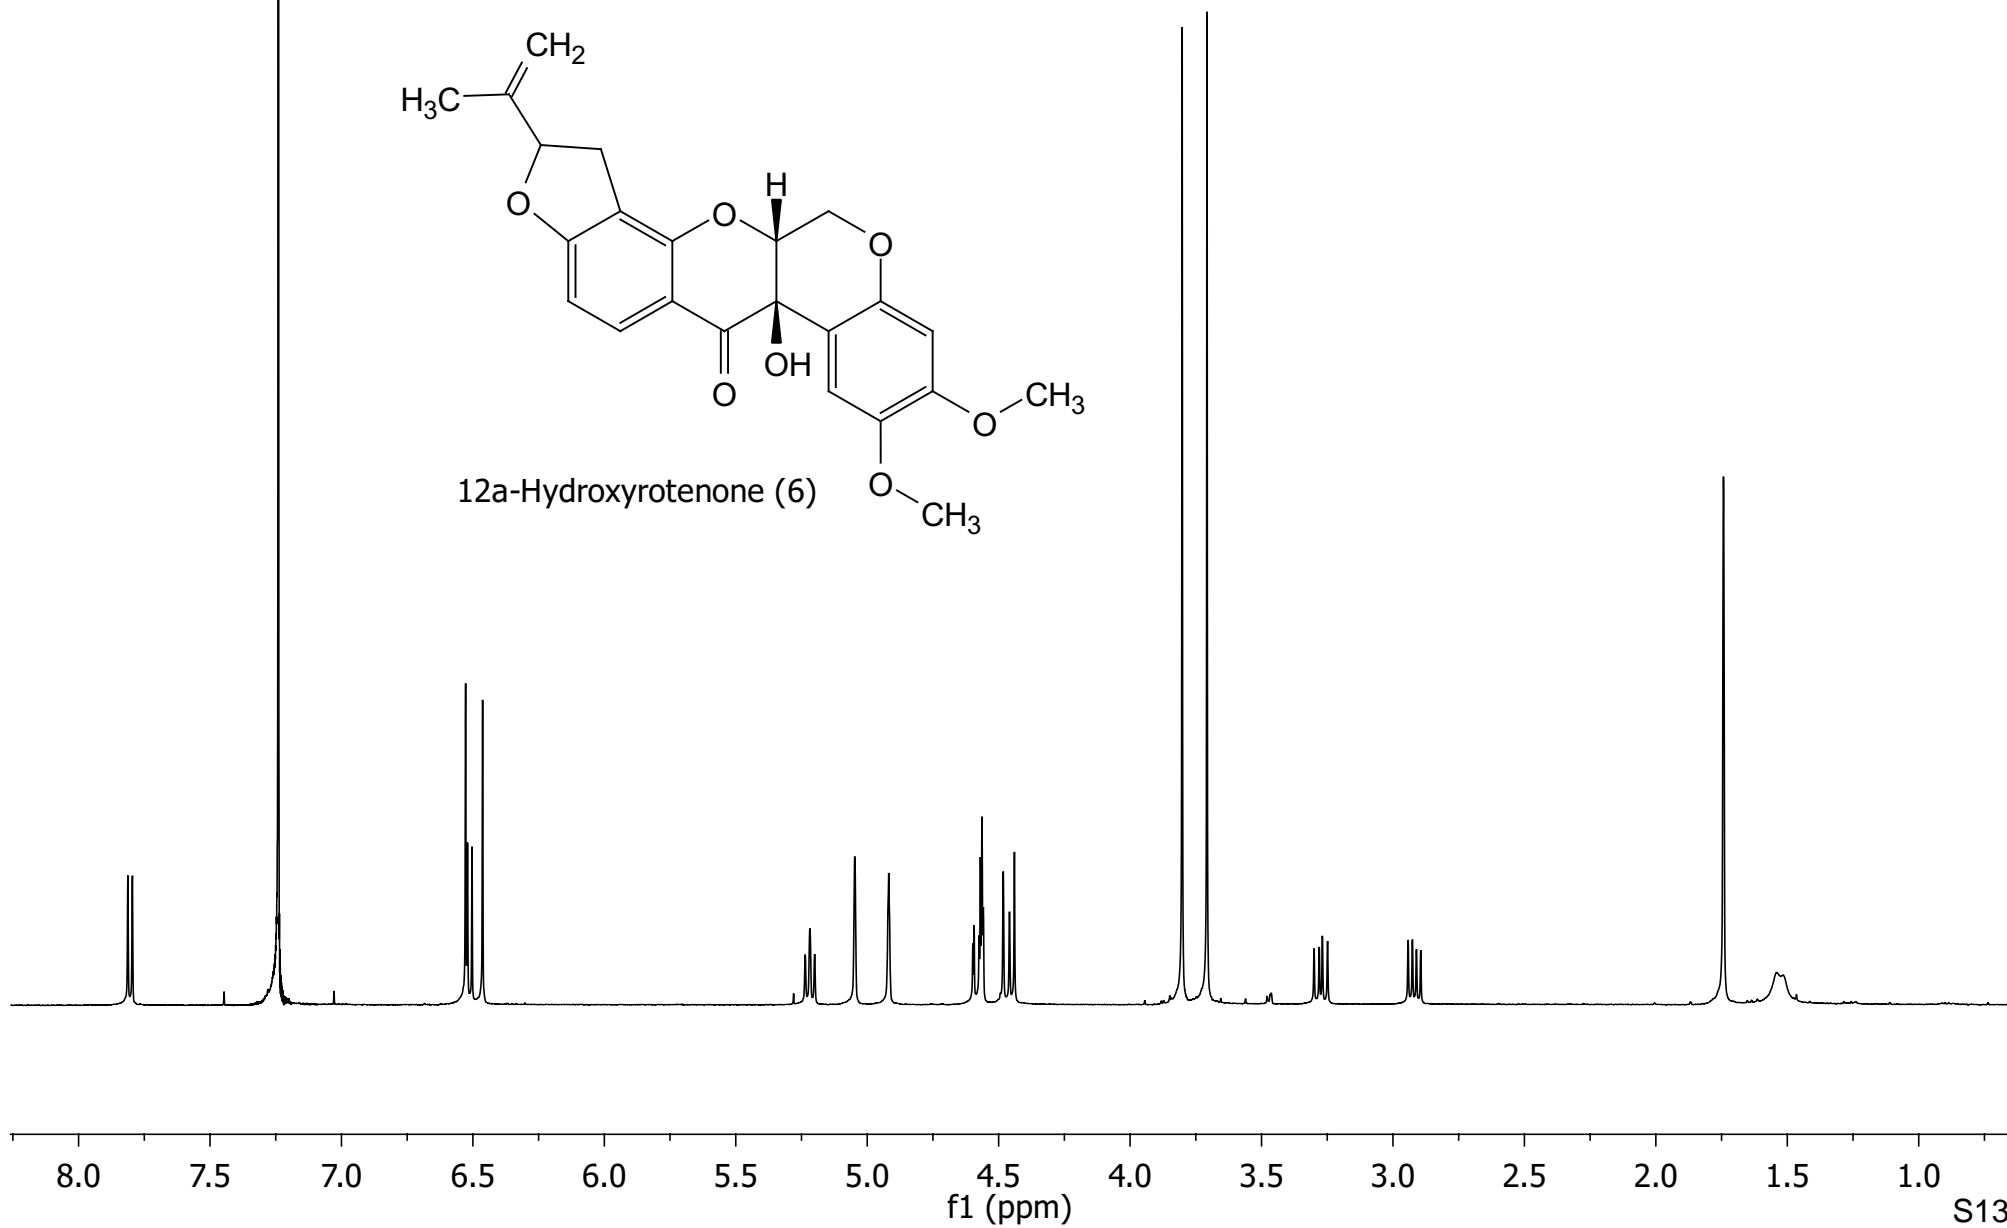

**Figure S13.**  $^{13}\text{C}$  NMR Spectrum (125 MHz) of 12a-Hydroxyrotenone (6) in  $\text{CDCl}_3$

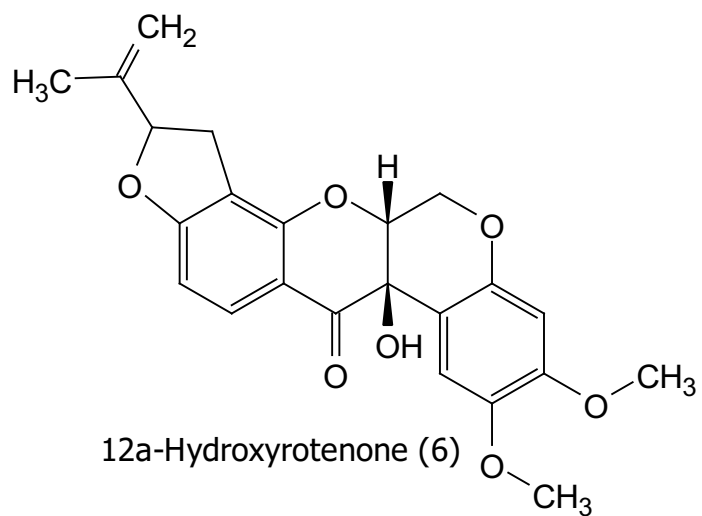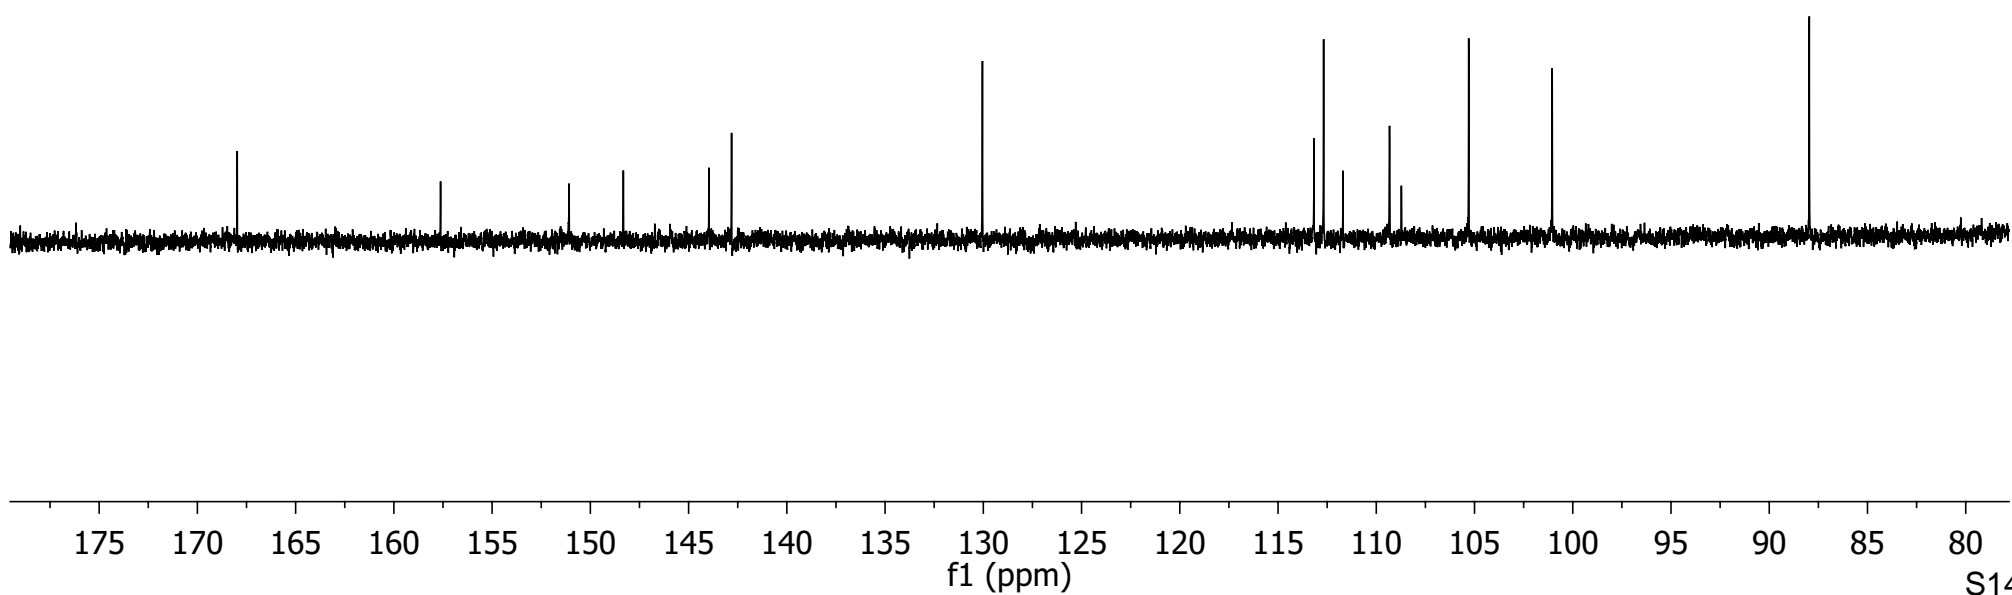

**Figure S14.**  $^1\text{H}$  NMR Spectrum (500 MHz) of Tephrosin (7) in  $\text{CDCl}_3$

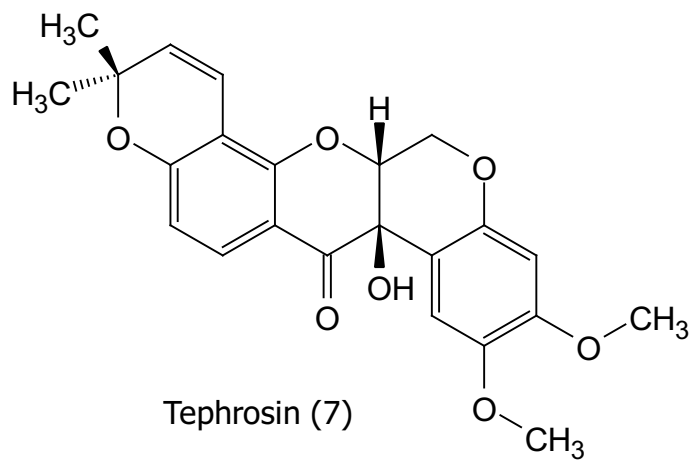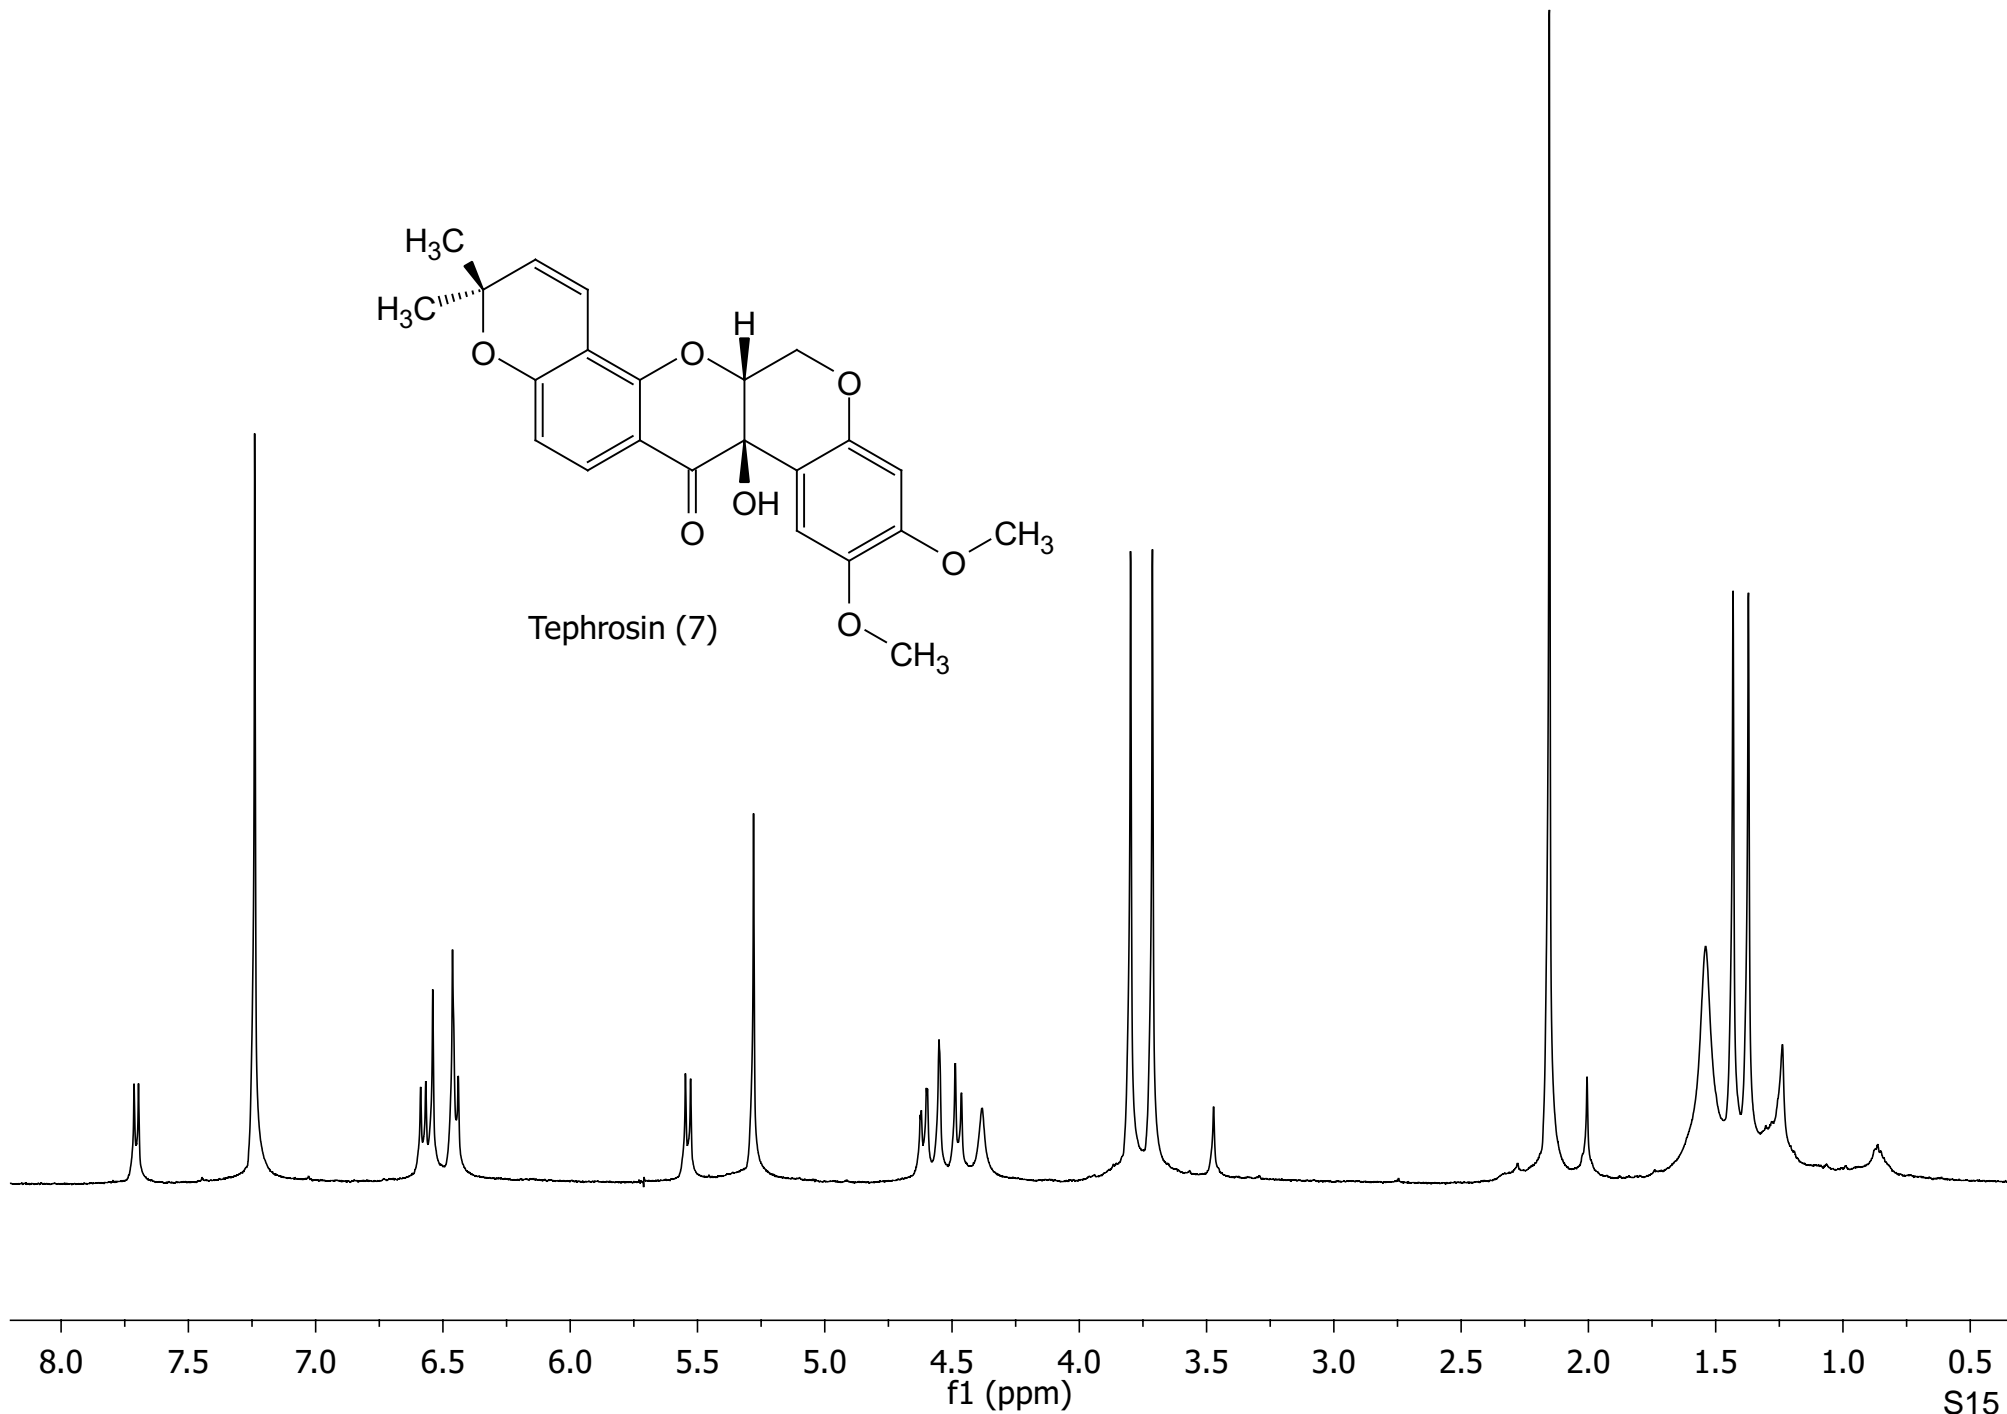



**Figure S15.**  $^1\text{H}$  NMR Spectrum (600 MHz) of (S)-MTPA Ester of Pierreione A (8a) in  $\text{Py-d}_5$

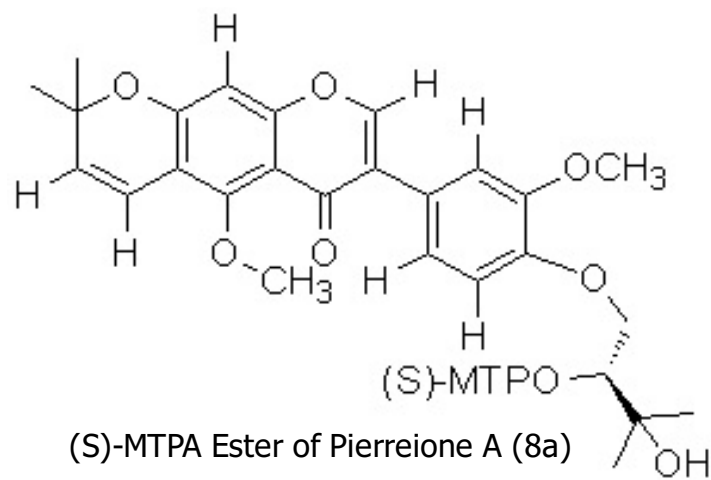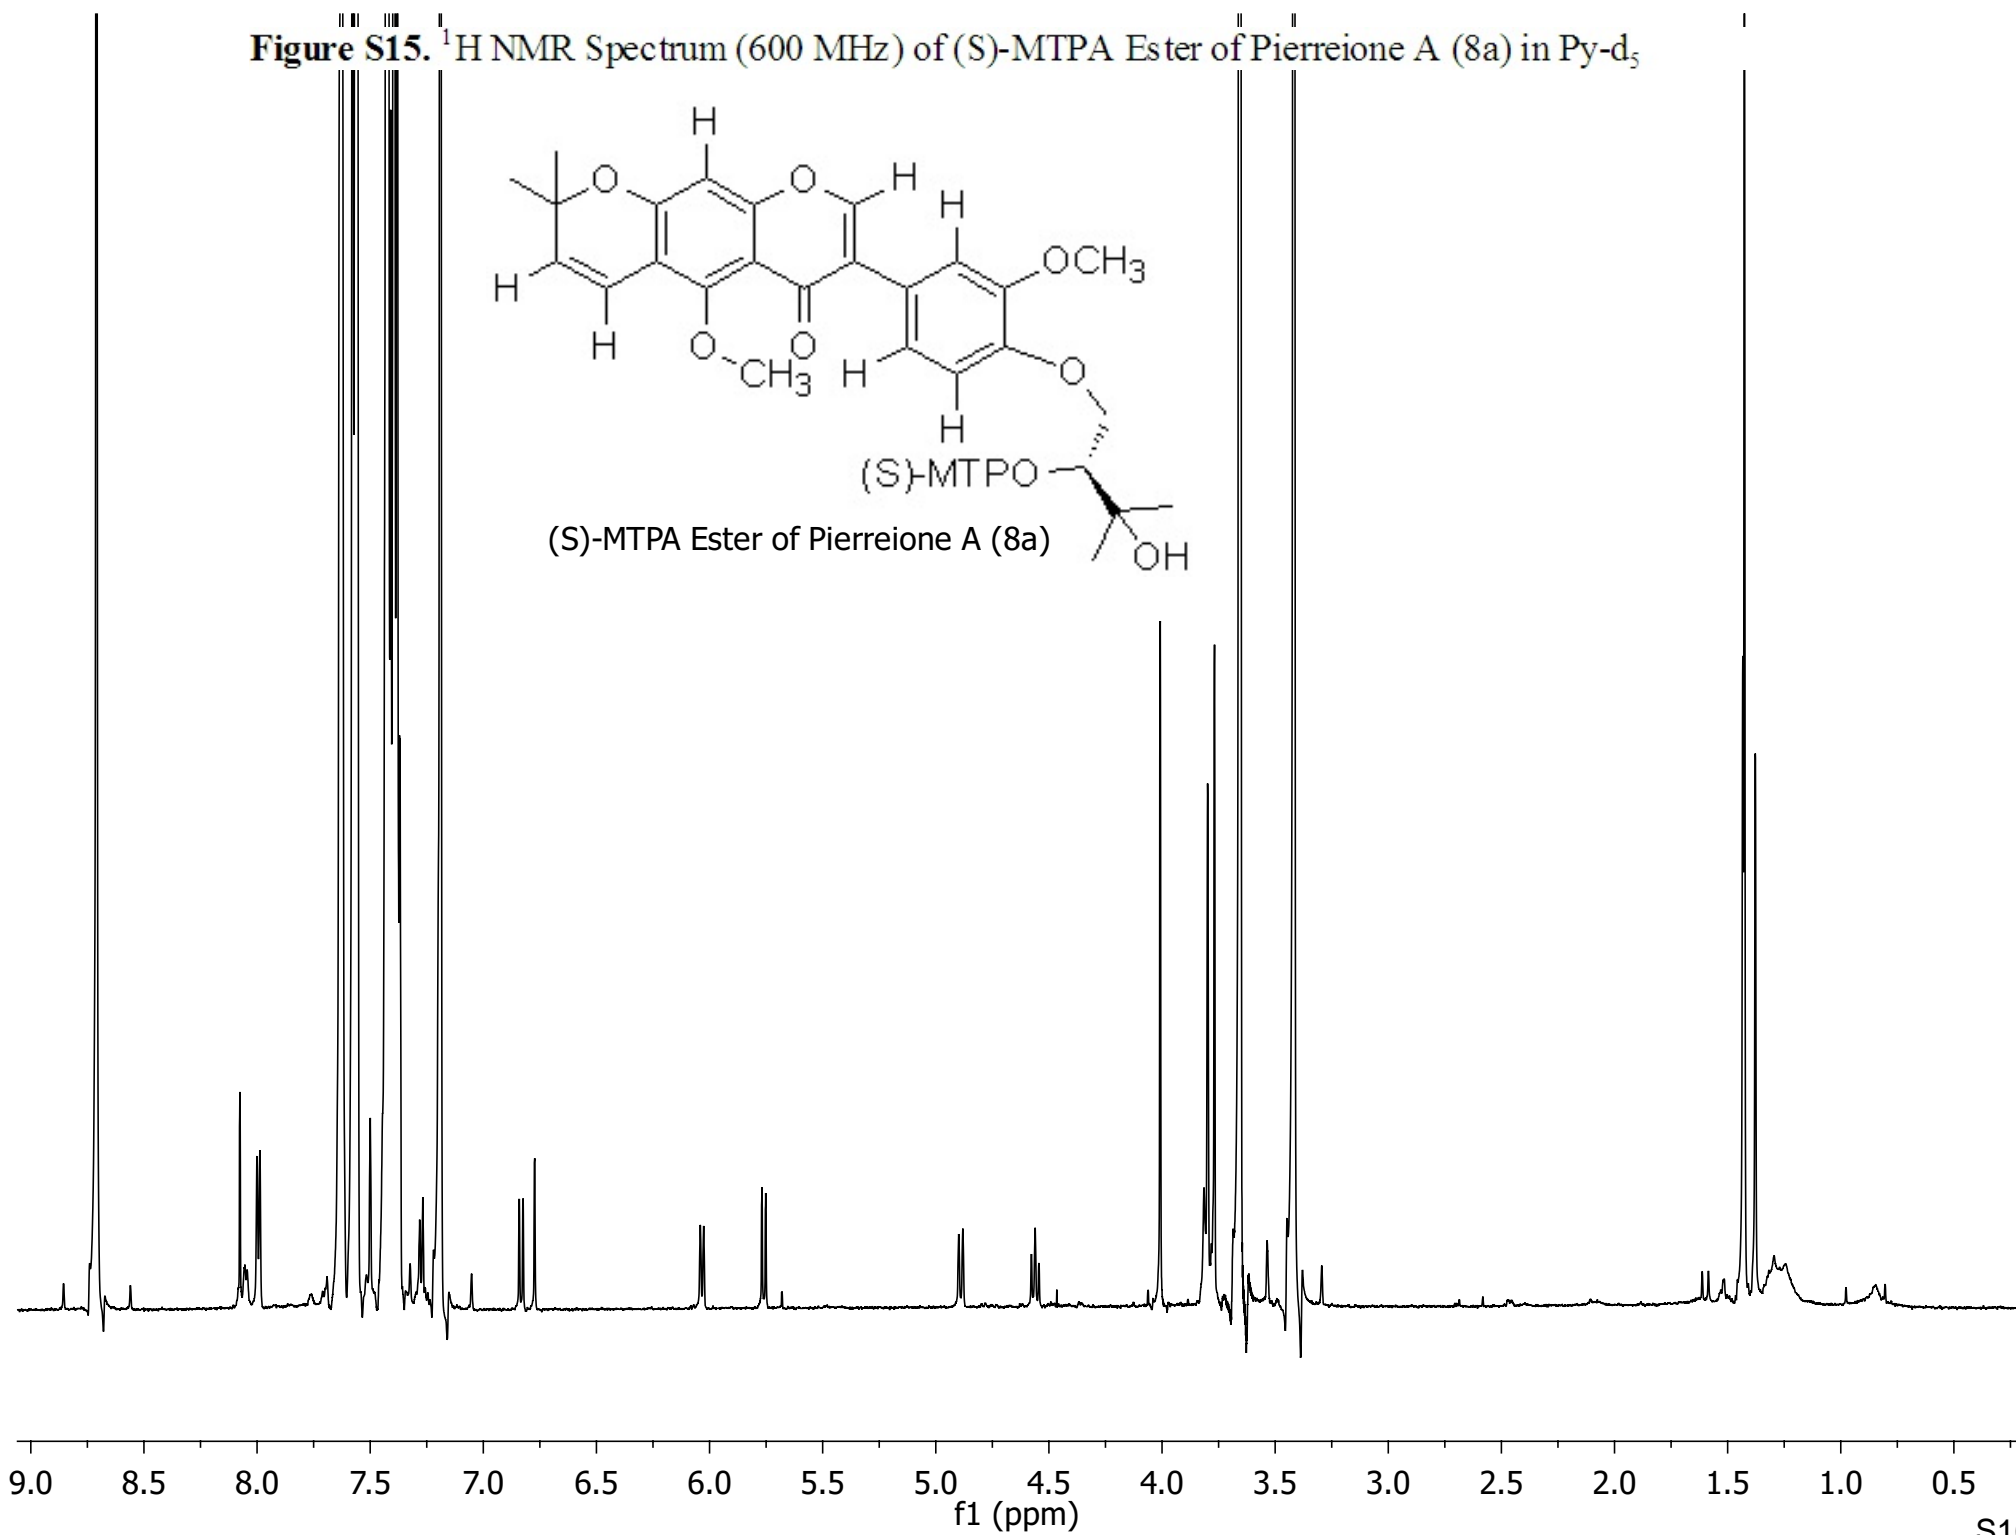

**Figure S16.**  $^1\text{H}$  NMR Spectrum (600 MHz) of (R)-MTPA Ester of Pierreione A (8b) in  $\text{Py-d}_5$

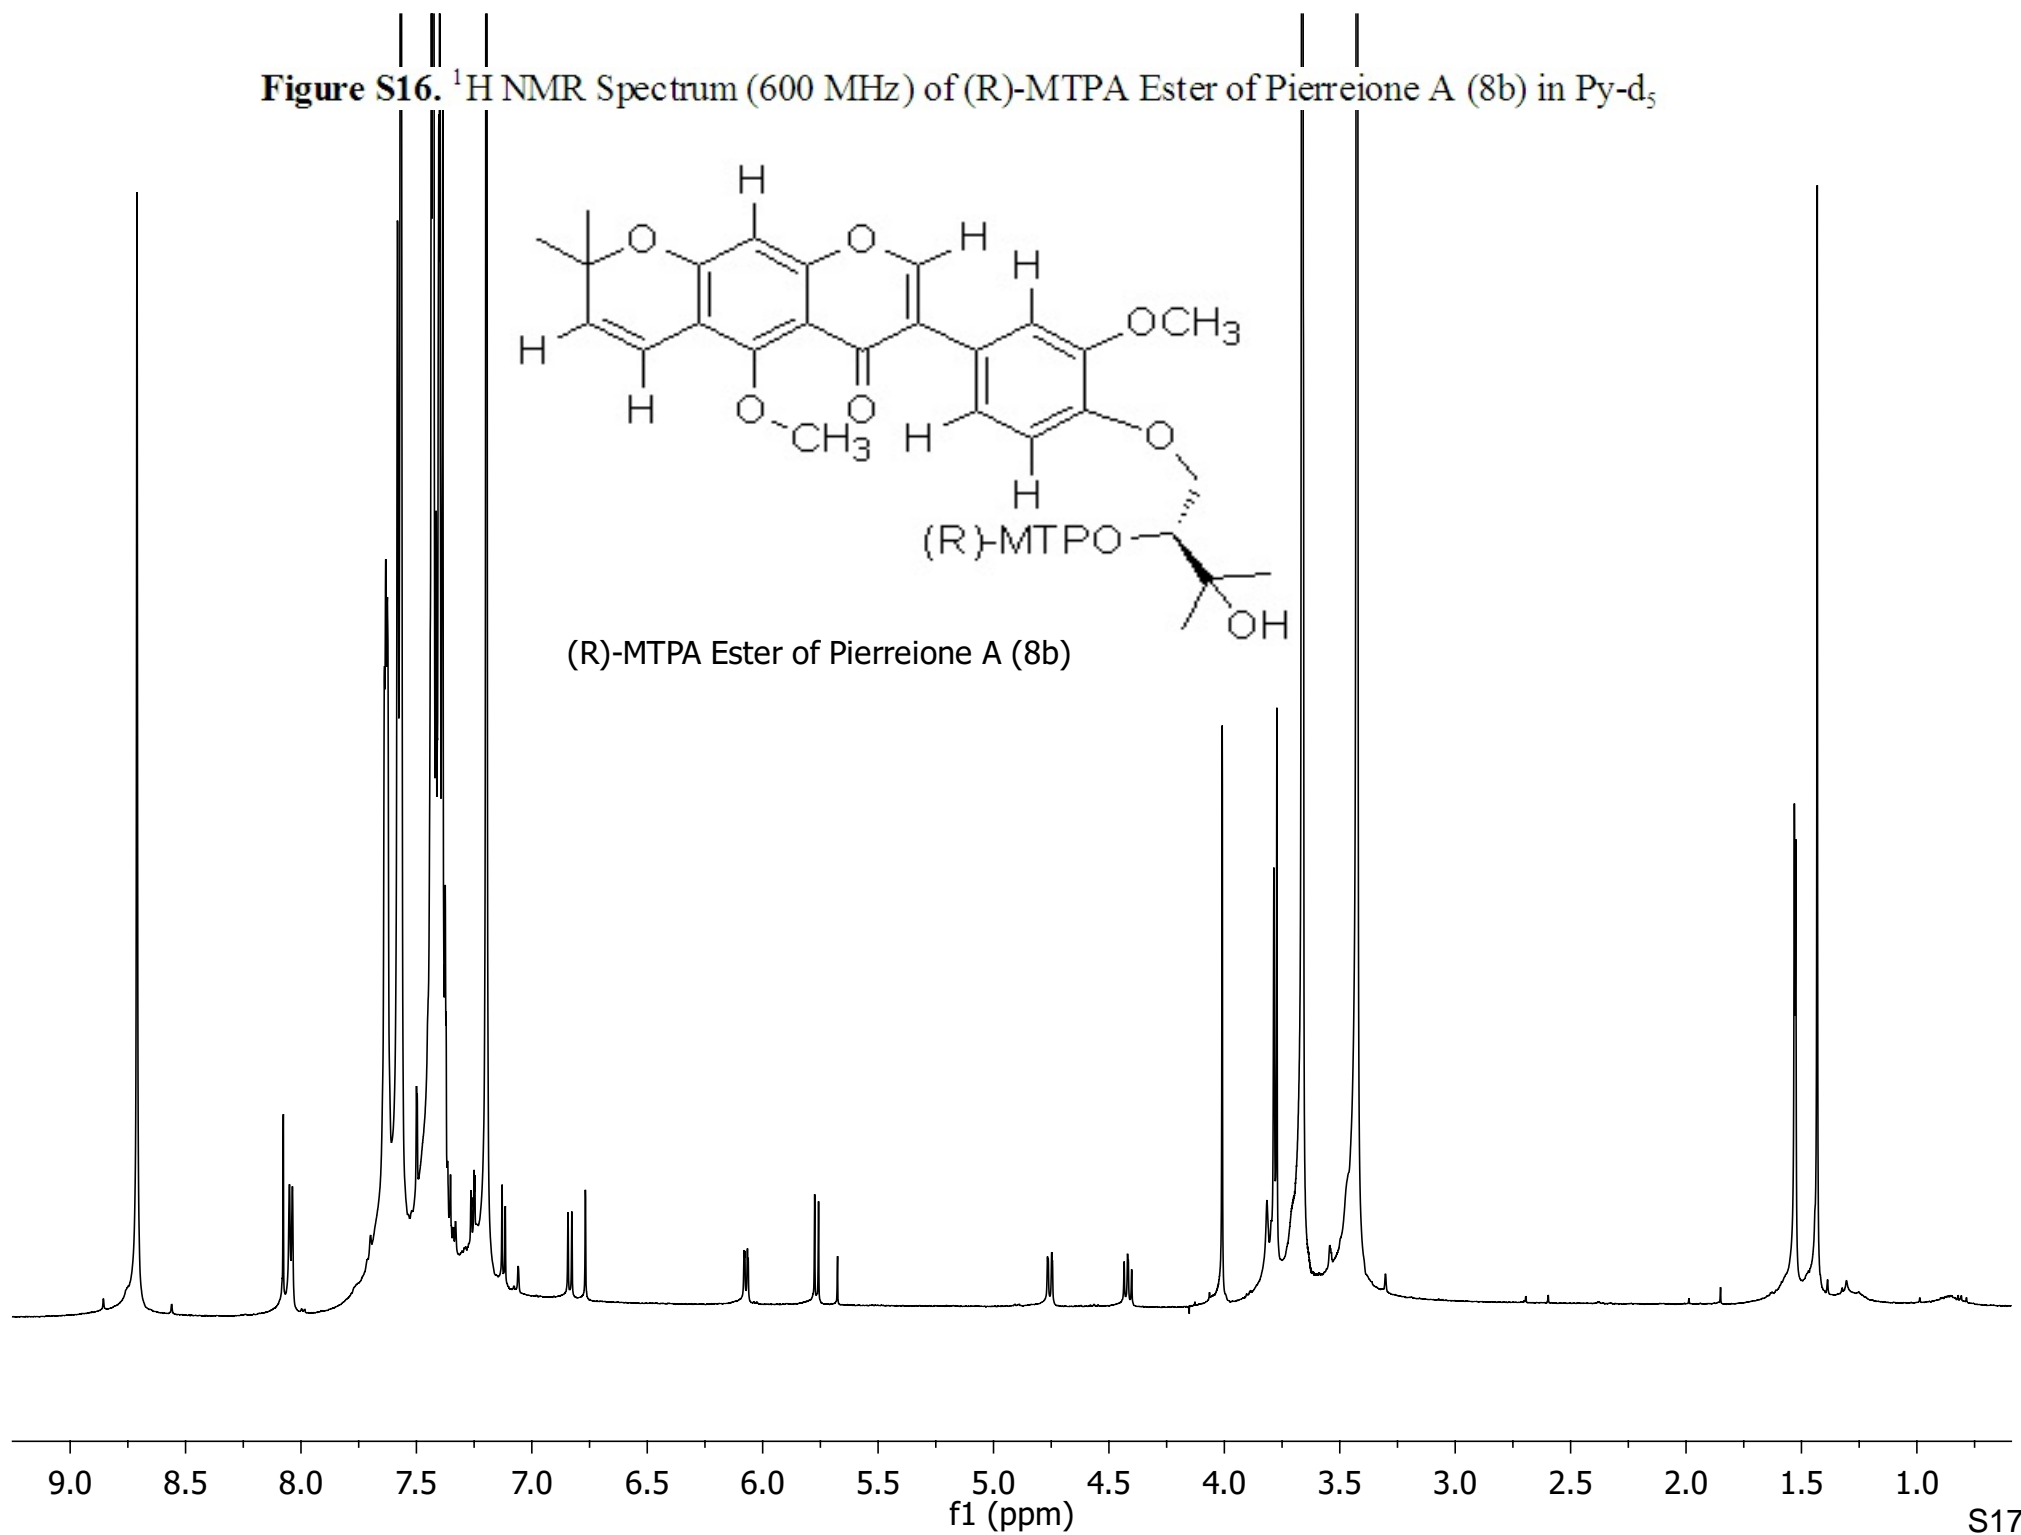

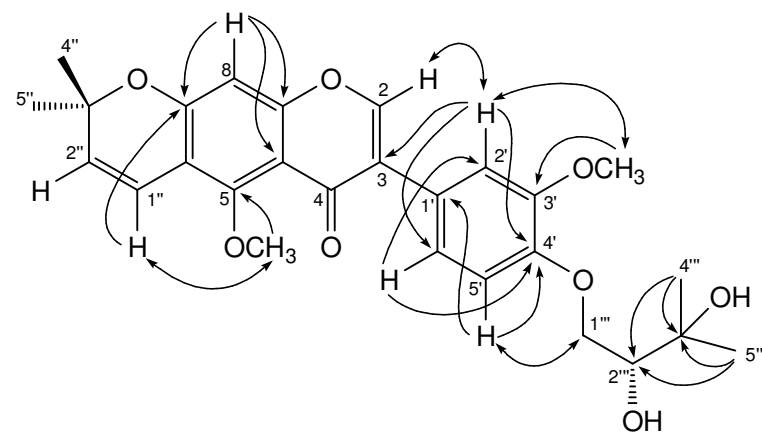

**Figure S17.** Key HMBC (H→C) and NOE (H↔H) correlations for **1**.

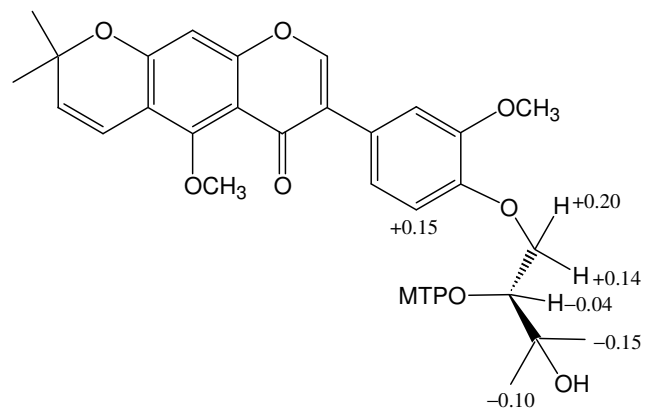

**Figure S18.**  $\Delta\delta$  values [ $\Delta\delta$  (in ppm) =  $\delta_S - \delta_R$ ] obtained for (*S*)- and (*R*)-MTPA esters (**8a** and **8b**, respectively) of **1**.
